# Supplementary material
Source: PubMed Central journal article supplement (PMC5729098)
Supplement: NIHMS923785-supplement-Supplemental_information.pdf [file NIHMS923785-supplement-Supplemental_information.pdf]

# **SUPPORTING INFORMATION**

## **Identification of a functionally unique family of penicillin-binding proteins**

Michael A. Welsh,<sup>1</sup> Atsushi Taguchi,<sup>1†</sup> Kaitlin Schaefer,<sup>1,2†</sup> Daria Van Tyne,<sup>3</sup> François Lebreton,<sup>3</sup> Michael S. Gilmore,<sup>1,3</sup> Daniel Kahne,<sup>2\*</sup> and Suzanne Walker<sup>1\*</sup>

<sup>1</sup> Department of Microbiology and Immunobiology, Harvard Medical School, Boston, Massachusetts 02115

<sup>2</sup> Department of Chemistry and Chemical Biology, Harvard University, Cambridge, Massachusetts 02138

<sup>3</sup> Department of Ophthalmology, Harvard Medical School, Massachusetts Eye and Ear Infirmary, Boston, Massachusetts 02114

† These authors contributed equally.

\* Correspondence to: [suzanne\\_walker@hms.harvard.edu](mailto:suzanne_walker@hms.harvard.edu), [kahne@chemistry.harvard.edu](mailto:kahne@chemistry.harvard.edu)

## METHODS

**Materials.** All reagents and chemicals were purchased from Sigma-Aldrich, unless indicated otherwise. Lipid II from *Staphylococcus aureus* (1), *Escherichia coli* (5), and *Bacillus subtilis* (6) was extracted from cells as previously described.<sup>1</sup> Lipid II variant 4 was synthesized as reported.<sup>2</sup> Genomic DNA from *Streptococcus gordonii* was purchased from ATCC (ATCC 35105D-5). PBP2a from *Enterococcus faecalis* was expressed and purified as previously reported.<sup>3</sup> SgtB from *S. aureus* and its Y181D point mutant (abbreviated as SgtB\* in the main text) were expressed and purified as previously described.<sup>4</sup> *E. coli* PBP5 was expressed and purified as reported previously.<sup>5</sup> Fmoc-biotin-D-lysine (BDL) was purchased from Bachem and de-protected as reported previously.<sup>6</sup> PCR primers were purchased from Integrated DNA Technologies. Restriction endonucleases were purchased from New England Biolabs.

**Bacterial Culture.** The bacterial strains and plasmids used in this study are listed in Table S1. Unless indicated otherwise, all strains were grown at 37 °C. *Enterococcus faecalis* strains were grown with shaking in brain-heart infusion broth (BHI, Hardy Diagnostics) or on agarized plates. *E. coli* strains were grown with shaking in LB broth (Beckton Dickinson) or on agarized plates. *Streptococcus gordonii* strains were grown in Todd Hewitt broth (THB, Beckton Dickinson) or on agarized BHI plates. *Streptococcus pneumoniae* strains were grown in THB containing 0.5% yeast extract (THY, Beckton Dickinson). *S. gordonii* and *S. pneumoniae* were grown without shaking at 37 °C in an atmosphere containing 5% CO<sub>2</sub>. When growth on solid medium was required, *S. pneumoniae* strains were grown on pre-poured tryptic soy agar 5% sheep blood (TSAII 5% SB, Beckton Dickinson) plates with a 5 mL overlay of 1% nutrient broth (NB, Beckton Dickinson) agar containing any required antibiotics. Antibiotics were used at the following concentrations: carbenicillin, 100 µg/mL; erythromycin, 0.2 µg/mL (*S. pneumoniae*) or 10 µg/mL (*S. gordonii*); kanamycin, 50 µg/mL; spectinomycin, 500 µg/mL; tetracycline, 4 µg/mL.

**Instrumentation.** Mass spectrometry data was analyzed using Agilent MassHunter Workstation Qualitative Analysis software version B.06.00. LC-MS was conducted using an Agilent Technologies 1200 series HPLC in line with an Agilent 6520 Q-TOF mass spectrometer using electrospray ionization (ESI). Funding for the Agilent Q-TOF was supported, in part, by the Taplin Funds for Discovery program.

**Generation of a sequence similarity network for the Peptidase\_S11 Pfam family.** Sequence alignment data was generated using the EFI Enzyme Similarity Tool<sup>7</sup> (<http://efi.igb.illinois.edu/efi-est/index.php>) using Option B with the Peptidase\_S11 Pfam family (PF00768) as the input sequence set and with Pfam-defined domains enabled. A similarity network was then created using an alignment score corresponding to approximately 40% sequence identity and filtering for sequences between 190 and 260 residues in length. Data was plotted using Cytoscape version 3.2.0.

**Cloning of *E. faecalis* PBPX.** The *ef\_3129 [T36-P429]* gene encoding truncated *E. faecalis* PBPX, lacking the N-terminal signal peptide and C-terminal transmembrane helices, was amplified from *E. faecalis* V583 genomic DNA

using the primers (5'-GTAGCTAGCACTCACGCAGAAGAAGATATTACCG-3') and (5'-ACTGGATCCTTAGGGAATAAAATGATTTCGGTTCTGCAAC-3'). After gel purification and digestion with NheI and BamHI, the DNA fragment was ligated into pET28b(+) to produce plasmid pMW1010, which expresses *E. faecalis* PBPX [T36-P429] with an N-terminal His<sub>6</sub> tag. The *ef\_3129* [T36-P429] insert was confirmed by sequencing.

**Cloning of *S. gordonii* PBPX.** The *sgo\_1585* [E24-S392] gene encoding truncated *S. gordonii* PBPX, lacking the N-terminal signal peptide and C-terminal transmembrane helix, was amplified from *S. gordonii* V288 (Challis) genomic DNA using the primers (5'-GTACATATGGAGCTGATGGATATTACTCGG-3') and (5'-ACTGGATCCTTAAGAATCCATAACTGGTGAGTC-3'). After digestion with NdeI and BamHI and gel purification of the digested product, the DNA fragment was ligated into pET28b(+) to produce plasmid pAT1, which expresses *S. gordonii* PBPX [E24-S392] with an N-terminal His<sub>6</sub> tag. The *sgo\_1585* [E24-S329] insert was confirmed by sequencing.

**Knockout of *S. pneumoniae murMN*.** The *murMN* genes, encoding the enzymes responsible for adding the branch peptide to Lipid II, were deleted via allelic replacement with an erythromycin resistance cassette (*erm*) according to a previously published method.<sup>8</sup> The two ~1 kb regions flanking *murMN* were amplified from *S. pneumoniae* R6 genomic DNA using the primers (5'- TGGCTAGAGCTCGTGTTC -3') and (5'- TCCTGCCTTTCCTCCCTCTTCCCAGTAGTACCACTCG -3') for the fragment upstream of *murM* and (5'- GAGAGCACAGATACGGCGGATGAAAAAGTCAGTATTTAGATTTC -3') and (5'- CCTCAATATTAGACTCCGTAACAA -3') for the fragment downstream of *murN*. The *erm* gene was amplified from *S. pneumoniae* D39  $\Delta bga::erm$  genomic DNA using the primers (5'- GAGGGAGGAAAGGCAGGA -3') and (5'- CGCCGTATCTGTGCTCTC -3'). The three DNA fragments were assembled and amplified by overlap extension PCR.

*S. pneumoniae* R6 was transformed using the following protocol.<sup>8</sup> Cells were grown to mid-log phase in THY broth and then back-diluted to an OD<sub>600</sub> of 0.025. This culture was grown to OD<sub>600</sub> ~0.2 and back-diluted again to an OD<sub>600</sub> of 0.03 into fresh THY containing 1 mM CaCl<sub>2</sub> and 0.2% bovine serum albumin. Competence was stimulated by adding 500 pg/mL competence stimulating peptide (CSP-1, AnaSpec) and the cells incubated for 15 min. To 1 mL of cell suspension, 200 ng of PCR product was added and the resulting culture grown for 1 h. Aliquots of this culture (100  $\mu$ L) were combined with 5 mL molten 1% NB agar, supplemented with erythromycin, and the mixture poured over fresh TSAII 5% SB plates. Transformants were selected after overnight incubation at 37 °C.

**Knockout of *S. gordonii* PBPX.** The *sgo\_1585* gene was deleted via allelic replacement with *erm*. The two ~1kb regions flanking *sgo\_1585* were amplified from *S. gordonii* genomic DNA using the primers (5'- TTAAAATATGGAAATTTCTATCTTGAC-3') and (5'- TCCTGCCTTTCCTCCCTCAGCCTCCTAATTTTTCATCGT-3') for the fragment upstream of *sgo\_1585* and (5'- GAGAGCACAGATACGGCGCCAGCCCTTTTGTAATGTTAGA-3') and (5'-

CATGTTTAGAAGCCAAGGTCAA-3') for the fragment downstream of *sgo\_1585*. The two fragments, together with the *erm* gene amplified from *S. pneumoniae* D39  $\Delta bga::erm$  genomic DNA, were assembled and amplified by overlap extension PCR.

The linear PCR product was inserted into *S. gordonii* V288 (Challis) according to a previously published protocol.<sup>9</sup> An overnight 1 mL culture was back-diluted to 20 mL THB containing 5% heat-inactivated horse serum (THB-HS). This culture was grown for 2 h and the resulting 1 mL culture was diluted again in 20 mL THB-HS and incubated for another 2 h. For transformation, 50  $\mu$ L of this culture was combined with 450  $\mu$ L THB-HS and 1  $\mu$ g PCR product and incubated for 2 h. Transformants were selected by plating the cells on BHI plates, supplemented with erythromycin, and incubating overnight at 37 °C.

**Expression and Purification of LMW PBPs: General Method.** *Sa*PBP4, *Ej*PBPX, and *Sg*PBPX were expressed and purified via a previously reported protocol.<sup>6</sup> The appropriate PBP expression plasmid was transferred to *E. coli* BL21(DE3). Overnight cultures were diluted 1:100 into 1 L fresh LB medium supplemented with appropriate antibiotics and grown at 37 °C with shaking until the OD<sub>600</sub> was 0.4-0.5. The cultures were cooled to 16 °C and protein expression was induced with 500  $\mu$ M isopropyl  $\beta$ -D-1-thiogalactopyranoside (IPTG) for 18 h with shaking. Cells were harvested by centrifugation (5,300  $\times$  g, 20 min, 4 °C) and the pellet suspended in 30 mL binding buffer (20 mM Tris pH 7.5, 400 mM NaCl) supplemented with 1 mM phenylmethylsulfonyl fluoride (PMSF) and 500  $\mu$ g/mL DNase. Cells were lysed by three passages through a cell disrupter at 10,000 psi and the cell lysate pelleted by ultracentrifugation (90,000  $\times$  g, 30 min, 4 °C). The resulting supernatant was supplemented with 40 mM imidazole, added to 1.5 mL washed Ni-NTA resin (Qiagen), and rocked at 4 °C for 40 min. After loading the gravity column, the resin was washed with 20 mL wash buffer (20 mM Tris pH 7.5, 40 mM NaCl, 40 mM imidazole, 0.1% Triton X-100). The protein was eluted in 10 mL of elution buffer (20 mM Tris pH 7.5, 500 mM NaCl, 200 mM imidazole, 0.1% reduced Triton X-100). The eluate was concentrated to ~1 mL using a 30 kD MWCO Amicon Ultra Centrifuge Filter and the final protein concentration was measured via BCA assay. The protein was then diluted to 200  $\mu$ M in binding buffer (above), aliquoted, and stored at -80 °C.

**Bocillin-binding Assay for PBP Folding.** Purified PBPs (2.5  $\mu$ M) were incubated at 37 °C for 1 h with varying concentrations of penicillin-G (PenG) in assay buffer (20 mM potassium phosphate, 140 mM NaCl, pH 7.5) in a total volume of 9  $\mu$ L. Bocillin-FL (1  $\mu$ L of a 100  $\mu$ M stock, ThermoFisher) was added and the proteins incubated for an additional 30 min at 37 °C. The reactions were quenched with 2x loading dye and the proteins separated via SDS-PAGE. The gels were then imaged using a Typhoon scanner at excitation 488 nm and emission 526 nm.

**Large Scale Extraction of Lipid II from *E. faecalis*.** Lipid II was extracted from 6 L (4  $\times$  1.5 L) of *E. faecalis* MMH594 culture according to a previously published protocol, with modifications.<sup>1a</sup> Overnight cultures of *E. faecalis* MMH594 (10 mL) were grown in brain-heart infusion (BHI) broth. A 10 mL overnight was used to inoculate each 1.5 L of fresh BHI broth and the cultures grown at 37 °C with shaking until the OD<sub>600</sub> was 0.5-0.6. To accumulate Lipid II, vancomycin and moenomycin A were added at final concentrations of 10  $\mu$ g/mL and 5

µg/mL, respectively, to each culture and the flasks incubated at room temperature with periodic swirling for 15 min. The cultures were then poured into pre-chilled centrifuge bottles and the cells immediately harvested by centrifugation ( $3,500 \times g$ , 20 min, 4 °C). The pellets from 6 L of culture were suspended in phosphate-buffered saline (PBS, pH 7.4) at a combined final volume of 30 mL. The cell suspension was then divided equally (15 mL) into two 125 mL Erlenmeyer flasks, each of which contained 52.5 mL chloroform:methanol (1:2). The mixture was stirred vigorously at room temperature for 1 h to lyse the cells. The cell lysate from each Erlenmeyer flask was divided equally between two 50 mL Teflon centrifuge tubes and the insoluble material pelleted at  $4,000 \times g$  for 10 min at 4 °C. The supernatants from two Teflon tubes were combined into a 125 mL Erlenmeyer flask containing 30 mL chloroform and 22.5 mL PBS (pH 7.4). The mixture was stirred vigorously (to ensure thorough mixing of layers) at room temperature for 1 h. The pH of the final homogenized suspension was neutralized by dropwise addition of 4 M NaOH and the mixture divided between three 50 mL Teflon tubes. The tubes were centrifuged at  $4,000 \times g$  for 10 min at 4 °C to separate the layers and then stored at 4 °C overnight. Upon warming to room temperature, a white layer at the aqueous-organic interface, enriched in Lipid II and Park's nucleotide, was observed in each tube.<sup>1a</sup> The interface layers were carefully isolated from the aqueous and organic layers using a Pasteur pipette, combined, and dried *in vacuo*.

To remove Park's nucleotide, the dried interface layer was dissolved in 15 mL of 6 M pyridinium acetate:*n*-butanol (1:2) and washed with 15 mL *n*-butanol-saturated water. The aqueous layer was removed and re-extracted with 10 mL of 6 M pyridinium acetate:*n*-butanol (1:2). Combined organic layers were washed three times with 10 mL *n*-butanol-saturated water and the final, clean organic layer dried *in vacuo*. The residue was dissolved in a small volume of methanol, transferred to a sample vial (residual pyridinium acetate precipitate was removed by filtration, if present), and the volatiles removed under blowing N<sub>2</sub> gas. The final Lipid II residue was dissolved in a small amount of DMSO and stored at -20 °C. The Lipid II was quantified by amino acid analysis. The estimated yield from this procedure was 200 µg Lipid II per L of culture.

**Extraction of Lipid II from *S. pneumoniae* Δ*murMN*.** A culture of *S. pneumoniae* Δ*murMN* was grown to mid-log phase in THY at 37 °C in an atmosphere of 5% CO<sub>2</sub>. The culture was back-diluted 1:100 into 6 x 0.5 L fresh THY medium and the cultures grown to an OD<sub>600</sub> of 0.6. To accumulate Lipid II, vancomycin was added at a final concentration of 8 µg/mL and the cultures grown for an additional 20 min. The cells were then pelleted and the Lipid II isolated via the same procedure as for *E. faecalis*, above.

**Biotinylation of Lipid II/peptidoglycan and detection via western blot.** The protocol for Lipid II biotinylation and detection was adapted from a previously published method.<sup>6</sup> Briefly, 10× reaction buffer (500 mM HEPES, 100 mM CaCl<sub>2</sub>, pH 7.5), BDL (3 mM), Lipid II (3 µM), and PBP (10 µM) were combined in a final volume of 10 µL (10% DMSO) in an Eppendorf tube. For peptidoglycan biotinylation, Lipid II was first polymerized, under the same conditions, with SgtB<sup>Y181D</sup> (5 µM) for 10 min before addition of the PBP. Reactions were incubated at room temperature for 1 h and quenched by addition of 10 µL 2× SDS loading dye. The samples were then loaded into a 4-20% gradient polyacrylamide gel and run at 200 V. The products were then transferred onto a PVDF membrane

(BioRad). The membrane was blocked with SuperBlock TBS blocking buffer (ThermoFisher) for 1 h at room temperature and the biotinylated products detected by incubation with a streptavidin-horseradish peroxidase conjugate (Pierce, 1:10,000 in SuperBlock) for an additional hour. Membranes were washed 3 x 10 min with TBST (0.01% Tween 20). Blots were then visualized by incubating the membranes in ECL reagent (ThermoFisher) and exposing to CL-Xposure film (ThermoFisher) or imaging using an Amersham Imager 600 CCD camera.

**Lipid II labeling reactions and LC-MS analysis.** This procedure was adapted from prior reports.<sup>6, 10</sup> Unless indicated otherwise, Lipid II labeling reaction conditions (optimized) were as follows. For *S. aureus* Lipid II (1): 8  $\mu$ M Lipid II, 20  $\mu$ M PBP, 25 mM D-amino acid, 1x reaction buffer (12.5 mM HEPES, 2 mM MnCl<sub>2</sub>, 0.25 mM Tween-80, pH 7.5), total volume 30  $\mu$ L, 10% DMSO. For *E. faecalis* Lipid II (2): 10  $\mu$ M Lipid II, 10  $\mu$ M PBP, 10 mM D-amino acid, 1x reaction buffer (50 mM HEPES, 10 mM CaCl<sub>2</sub>, pH 7.5), total volume 30  $\mu$ L, 5% DMSO. Reactions with **2** and SaPBP4 were conducted under the same conditions but with 30% DMSO.

Reactions were incubated at room temperature for 1 h. For reactions with *Ef*PBPX and *Sg*PBPX, an additional 10  $\mu$ M aliquot of PBP was added and the reaction incubated for another 1 h. The reactions were heat quenched at 95 °C for 10 min and allowed to cool to room temperature. SgtB (0.2  $\mu$ M) was added and the mixture incubated for 30 min at room temperature. To digest the polymerized material, reactions were treated with 4 U mutanolysin (from *Streptomyces globisporus*, Sigma-Aldrich) for 1.5 h at 37 °C followed by another 4 U aliquot with incubation for an additional 1.5 h. Sodium borohydride (10 mg/mL, 30  $\mu$ L) was added to reduce the cleaved muropeptides and the reactions incubated at room temperature for 30 min. The pH of the solution was then adjusted to ~4 by adding 20% phosphoric acid (approximately 5  $\mu$ L) and the reactions lyophilized to dryness. The residue was then suspended in 18  $\mu$ L water and subjected to LC-MS analysis as described below.

LC-MS was conducted with the MS operating in positive ion mode. The muropeptide fragments were separated on a Waters Symmetry Shield RP18 column (5  $\mu$ m, 3.9 x 150 mm) using the following method: 0.5 mL/min solvent A (H<sub>2</sub>O, 0.1% formic acid) for 5 min followed by a linear gradient of 0% solvent B (acetonitrile, 0.1% formic acid) to 40% B over 25 min. Molecular ions corresponding to the expected muropeptide fragments were extracted from the total ion chromatogram.

We note that we observed small decreases in labeling conversion after Lipid II stocks (in DMSO) had been freeze/thawed many times. To minimize this effect, aliquots of Lipid II were prepared at an appropriate working concentration and discarded after approximately 5 freeze/thaws.

**MS/MS analysis of Lipid II stem peptides.** Lipid II (20  $\mu$ M) was polymerized with SgtB (0.2  $\mu$ M) in reaction buffer (50 mM HEPES, 10 mM CaCl<sub>2</sub>, pH 7.5) at room temperature for 30 min (total volume 30  $\mu$ L, 10% DMSO). The resulting peptidoglycan strands were digested with mutanolysin and the muropeptide fragments reduced with NaBH<sub>4</sub> as above. The pH of the reactions was then adjusted to ~4 by adding 20% phosphoric acid (approximately 5  $\mu$ L) and the reactions lyophilized to dryness. The residue was then suspended in 18  $\mu$ L water and subjected to LC-MS analysis. Muropeptides were separated via the same HPLC method as above. MS/MS was conducted with the MS operating in positive ion mode and targeting the [M]<sup>+2</sup> ions for fragmentation. Ions were fragmented by

collision-induced dissociation (CID) with the collision energy calculated by the MS according to the following formula: CID energy = (slope · m/z) / (100 + offset), where slope = 3.1 and offset = 2.

**Radiolabeling of Lipid II.** Lipid II (~40 μM) was incubated with [<sup>14</sup>C]-D-Ala (1.5 mM) and *Ef*PBPX (30 μM) in reaction buffer (12.5 mM HEPES, 2 mM MnCl<sub>2</sub>, 0.25 mM Tween-80, pH 7.5) at room temperature for 1.5 h (40 μL reaction volume, 20% DMSO). The reaction was quenched by adding 900 μL H<sub>2</sub>O/0.1% NH<sub>4</sub>OH. The reaction mixture was loaded onto a Bakerbond SPE C18 disposable silica column (J. T. Baker) by gravity flow. The column was washed 6× with 600 μL H<sub>2</sub>O/0.1% NH<sub>4</sub>OH, 2× with 500 μL H<sub>2</sub>O/0.1% NH<sub>4</sub>OH/5% methanol, and 2× with 500 μL H<sub>2</sub>O/0.1% NH<sub>4</sub>OH/10% methanol. The Lipid II was eluted with 3× 500 μL methanol/0.1% NH<sub>4</sub>OH. Product yield was estimated by measuring [<sup>14</sup>C] counts via liquid scintillation and using a standard curve of [<sup>14</sup>C]-D-Ala to assess the amount of radiolabel incorporated. The elution fractions were then pooled and the solvents removed *in vacuo*. A 40 μM stock of the [<sup>14</sup>C]-D-Ala-Lipid II was prepared in DMSO.

To generate peptidoglycan oligomers, radiolabeled Lipid II (2 μL) was incubated with SgtB<sup>Y181D</sup> (5 μM) in reaction buffer (12.5 mM HEPES, 2 mM MnCl<sub>2</sub>, 0.25 mM Tween-80, pH 7.5) at room temperature for 30 min (20 μL reaction volume, 20% DMSO). The reactions were quenched by heating at 95 °C for 5 min and the solvents removed *in vacuo*. The residue was suspended in 10 μL 2× SDS loading dye and loaded into the wells of a 20 cm × 16 cm 10% acrylamide-Tris gel (prepared using Protogel).<sup>11</sup> The gel was run at 30 mA for 5 h with an anode buffer consisting of 100 mM Tris (pH 8.8) and cathode buffer consisting of 100 mM Tris, 100 mM tricine (pH 8.25), 0.1% SDS.<sup>11</sup> The gels were dried and then exposed to a phosphor screen for 48 h. The autoradiograph was imaged using a Typhoon scanner.

***E. faecalis* and *S. gordonii* peptidoglycan crosslinking assay.** Lipid II extracted from *E. faecalis* (2, 40 μM) was polymerized with SgtB (1 μM) in reaction buffer (50 mM HEPES, 10 mM CaCl<sub>2</sub>, pH 7.5) for 30 min at room temperature (total volume 30 μL, 10% DMSO). *Ef*PBPX or *Sg*PBPX (5 μM) was added and the reaction incubated at room temperature for 1 h. As a positive control for crosslinking, analogous reactions were conducted with a high molecular weight, class A PBP from *E. faecalis*, PBP2a.<sup>3</sup> *E. faecalis* PBP2a (5 μM) was incubated with Lipid II (400 μM) in reaction buffer for 1.5 h at room temperature (total volume 30 μL, 10% DMSO). The reactions were heat quenched at 95 °C for 10 min and allowed to cool to room temperature before digestion with mutanolysin and LC-MS analysis via the same protocol as for Lipid II labeling reactions, above.

**Construction of *E. faecalis* Tn::*EFpbpX* and Tn::*murN*.** *E. faecalis* strain MMH594<sup>12</sup> was transformed with pZXL5Tet, a tetracycline resistant derivative of the nisin-inducible *mariner* transposon delivery vector pZXL5<sup>13</sup> (see the complementation protocol, below, for the methods for electroporation). Tetracycline-resistant electrotransformants were initially selected at 28 °C in BHI broth supplemented with 5 μg/mL tetracycline and 10 μg/mL chloramphenicol, then diluted 1:1000 into BHI broth pre-warmed to 37 °C, and supplemented with 5 μg/mL tetracycline and 25 ng/mL nisin to induce transposition. Putative *mariner* insertion mutants were recovered, arrayed, and sequenced (Kenneth Beckman, University of Minnesota Genomics Center), to identify insertions in *EFpbpX*

(MMH594 *ukw\_2981::tet*; termed Tn::EFpbpX) and *murN* (MMH594 *ukw\_2089::tet*; termed Tn::murN). Tn::EFpbpX possesses the *mariner* transposon between bases 781 and 782 in *ukw\_2981*, which would be predicted to truncate the protein in a way that removes 232 of 493 amino acids from the C-terminus. Tn::murN possesses the *mariner* transposon insertion between bases 1027 and 1028 in *ukw\_2089*, which would be predicted to truncate the protein in a way that removes 83 of 426 amino acids from the C-terminus.

**Complementation of E/PBPX.** The *ef\_3129* gene, along with approximately 150 bp of the upstream promoter region, was amplified from *E. faecalis* V583 genomic DNA using the primers (5'-ATGATTACGAATTCGAGCTCCTGCAATTTTCAAGACTTTCTTGG -3') and (5'-CGACTCTAGAGGATCCTTAGAATAAAAAGAAACAAGCCAACG -3'). The purified DNA fragment was ligated into BamHI- and SacI-cut pAT28 via isothermal assembly to generate plasmid pMW1255. The *ef\_3129* insert was confirmed by sequencing.

Plasmids were introduced into *E. faecalis* MMH594 Tn::EFpbpX via electroporation according to a previously published protocol.<sup>14</sup> To generate electrocompetent cells, 50 mL of BHI broth supplemented with 0.5 M sucrose/8% glycine (w/v) was inoculated with 500  $\mu$ L of a stationary phase overnight culture of *E. faecalis* Tn::EFpbpX. The culture was grown with shaking at 37 °C for 20 h (final OD<sub>600</sub> 0.9-1.0). The culture was centrifuged at 2,500  $\times$  g for 20 min at 4 °C and the pellet washed 2 $\times$  with 40 mL ice cold 0.5 M sucrose/10% glycerol (v/v). After the final wash, cells were suspended in residual buffer, aliquoted, and stored at -80 °C. Before transformation, 50  $\mu$ L of electrocompetent cells were thawed on ice, 1  $\mu$ g of plasmid DNA added, and the cells incubated on ice for 30 min. The cells were then transferred to an ice cold 2 mm electroporation cuvette and pulsed at 2 kV. Immediately after pulsing, 1 mL of ice cold BHI with 0.5 M sucrose, 10 mM MgCl<sub>2</sub>, and 10 mM CaCl<sub>2</sub> was added. The suspension was chilled on ice for 5 min and then incubated static at 37 °C for 2 h. Transformants were selected on BHI plates supplemented with 500  $\mu$ g/mL spectinomycin and 4  $\mu$ g/mL tetracycline.

**Digestion and LC-MS analysis of *E. faecalis* and *S. gordonii* cell walls.** The protocol for isolation and mutanolysin digestion of *E. faecalis* and *S. gordonii* peptidoglycan was adapted from a previously published protocol.<sup>15</sup> BHI broth or THB (10 mL, supplemented with any required antibiotics) was inoculated with a single colony and the culture grown for at least 16 h at 37 °C. The final culture OD<sub>600</sub> was normalized to 1.6 and cells from a 2 mL aliquot harvested via centrifugation at 18,000  $\times$  g for 1 min at room temperature. The cell pellet was suspended in 1 mL 0.1 M Tris (pH 6.8)/0.25% sodium dodecylsulfate (w/v) and boiled at 100 °C for 20 min. The suspension was centrifuged at 18,000  $\times$  g for 1 min and the pellet washed 3 $\times$  with 1 mL water. The washed pellet was suspended in 1 mL water and sonicated in a water bath for 30 min. To this suspension, 500  $\mu$ L 0.1 M Tris (pH 6.8) with 15  $\mu$ g/mL DNase and 60  $\mu$ g/mL RNase was added and the mixture incubated at 37 °C with shaking for 2 h. After heat denaturing the enzymes at 95 °C for 5 min, the suspension was centrifuged at 18,000  $\times$  g for 3 min and the resulting pellet washed 1 $\times$  with 1 mL water. The pellet was then suspended in 500  $\mu$ L 1 M HCl and incubated at 37 °C for 4 h. The suspension was centrifuged at 18,000  $\times$  g for 3 min and the pellet washed with 1 mL aliquots of water until the supernatant pH was > 5. The peptidoglycan pellet was suspended in 100  $\mu$ L 12.5 mM NaHPO<sub>4</sub> (pH



5.5) and 10  $\mu$ L 4000 U/mL mutanolysin added. The peptidoglycan was digested at 37 °C with vigorous shaking for 16 h. The sample was heated at 95 °C for 5 min to denature the mutanolysin and the undigested/insoluble material pelleted by centrifugation at 18,000  $\times g$  for 5 min. The supernatant was transferred to a new microcentrifuge tube before adding 50  $\mu$ L 10 mg/mL NaBH<sub>4</sub> and incubating for 30 min at room temperature. The final pH was then adjusted to ~4 with 20% H<sub>3</sub>PO<sub>4</sub> before LC-MS analysis.

LC-MS analysis of peptidoglycan digests was conducted with the MS operating in positive ion mode. The muropeptide fragments were separated on a Waters Symmetry Shield RP18 column (5  $\mu$ m, 4.6 x 250 mm) using the following method: 0.5 mL/min solvent A (H<sub>2</sub>O, 0.1% formic acid) for 10 min followed by a linear gradient of 0% solvent B (acetonitrile, 0.1% formic acid) to 20% B over 90 min.

***In vitro* labeling of *E. faecalis* peptidoglycan with Lysine and Boc-Lysine.** To generate *E. faecalis* peptidoglycan, *E. faecalis* Lipid II (2, 10  $\mu$ M) was incubated with SgtB (1  $\mu$ M) and 10 mM lysine in 1 $\times$  reaction buffer (50 mM HEPES, 10 mM CaCl<sub>2</sub>, pH 7.5) for 20 min at room temperature (total volume 30  $\mu$ L, 5% DMSO). *E. faecalis* PBPX (10  $\mu$ M) was added and the reaction incubated for 1 hour at room temperature. The proteins were heat denatured at 95 °C for 10 min. Peptidoglycan strands were digested with mutanolysin and samples prepared for LC-MS as in the protocol for Lipid II labeling reactions, above.

#### **ACKNOWLEDGEMENTS**

We thank Prof. David Rudner for donating *S. pneumoniae* strains and Josue Flores-Kim for assistance with *S. pneumoniae* culture and genetics. We thank Elizabeth M. Selleck Fiore for technical advice in generating *E. faecalis* transposon mutants. We thank Yuan Qiao and Veerasak Srisuknimit for assistance with Lipid II extraction and technical advice in labeling experiments.

**Table S1: Bacterial strains and plasmids used in this study.**

| Strain or plasmid                            | Description*                                                                                                                                                                                                                                            | Reference  |
|----------------------------------------------|---------------------------------------------------------------------------------------------------------------------------------------------------------------------------------------------------------------------------------------------------------|------------|
| <i>Enterococcus faecalis</i>                 |                                                                                                                                                                                                                                                         |            |
| V583                                         | Wild-type; Van <sup>R</sup>                                                                                                                                                                                                                             | 16         |
| MMH594                                       | Wild-type                                                                                                                                                                                                                                               | 12         |
| Tn:: <i>EFpbpX</i>                           | MMH594 <i>ukw_2981::tet</i> ; Tet <sup>R</sup>                                                                                                                                                                                                          | This study |
| Tn:: <i>murN</i>                             | MMH594 <i>ukw_2089::tet</i> ; Tet <sup>R</sup>                                                                                                                                                                                                          | This study |
| <i>Streptococcus gordonii</i>                |                                                                                                                                                                                                                                                         |            |
| V288 (Challis)                               | Wild-type                                                                                                                                                                                                                                               | 17         |
| $\Delta$ SG <i>pbpX</i>                      | V288 $\Delta$ <i>sgo_1585::erm</i> ; Erm <sup>R</sup>                                                                                                                                                                                                   | This study |
| <i>Streptococcus pneumoniae</i>              |                                                                                                                                                                                                                                                         |            |
| R6                                           | Wild-type                                                                                                                                                                                                                                               | 18         |
| D39 $\Delta$ <i>cps</i> $\Delta$ <i>bgaA</i> | $\Delta$ <i>cps</i> , $\Delta$ <i>bgaA::erm</i> ; Erm <sup>R</sup>                                                                                                                                                                                      | 8          |
| $\Delta$ <i>murMN</i>                        | R6 $\Delta$ <i>murMN::erm</i> ; Erm <sup>R</sup>                                                                                                                                                                                                        | This study |
| <i>Escherichia coli</i>                      |                                                                                                                                                                                                                                                         |            |
| XL1 blue                                     | <i>endA1 gyrA96(nal<sup>R</sup>) thi-1 recA1 relA1 lac glnV44 F'[:Tn10 proAB<sup>+</sup> lacI<sup>q</sup> <math>\Delta</math>(lacZ)M15] hsdR17(r<sub>K</sub><sup>-</sup> m<sub>K</sub><sup>+</sup>)</i>                                                 | Stratagene |
| BL21(DE3)                                    | <i>F<sup>-</sup> ompT gal dcm lon hsdS<sub>B</sub>(r<sub>B</sub><sup>-</sup> m<sub>B</sub><sup>-</sup>) <math>\lambda</math>DE3[<i>lacI lacUV5-T7p07 ind1 sam7 nin5</i>] [<i>malB<sup>+</sup></i>]<sub>K-12</sub>(<math>\lambda</math><sup>S</sup>)</i> | 19         |
| <i>Plasmids</i>                              |                                                                                                                                                                                                                                                         |            |
| pET28b(+)                                    | IPTG-inducible protein expression vector; Kan <sup>R</sup>                                                                                                                                                                                              | Novagen    |
| pMW1010                                      | pET28b(+) carrying His <sub>6</sub> -EF_3129[T36-P429], <i>Ej</i> /PBPX expression vector; Kan <sup>R</sup>                                                                                                                                             | This study |
| pAT1                                         | pET28b(+) carrying His <sub>6</sub> -SGO_1585[E24-S392], SgPBXP expression vector; Kan <sup>R</sup>                                                                                                                                                     | This study |
| pPBP4[Y21-Q383]                              | pET28b(+) carrying His <sub>6</sub> -PBP4[Y21-Q383], SaPBP4 expression vector; Kan <sup>R</sup>                                                                                                                                                         | 6          |
| pPBP5[D30-N383]                              | pET22b carrying His <sub>6</sub> -PBP5[D30-N383], EcPBP5 expression vector; Carb <sup>R</sup>                                                                                                                                                           | 5          |
| pWTS645                                      | pET28b(+) carrying His <sub>6</sub> -PBP2a[A68-N728], <i>E. faecalis</i> PBP2a expression vector; Kan <sup>R</sup>                                                                                                                                      | 3          |
| pMgt1 <sup>†</sup>                           | <i>S. aureus</i> SgtB-His <sub>6</sub> expression vector; Carb <sup>R</sup>                                                                                                                                                                             | 20         |
| pET24bSgtBY181D <sup>‡</sup>                 | <i>S. aureus</i> SgtB <sup>Y181D</sup> -His <sub>6</sub> (SgtB*) expression vector; Kan <sup>R</sup>                                                                                                                                                    | 4          |
| pAT28                                        | Broad range shuttle vector; Spec <sup>R</sup>                                                                                                                                                                                                           | 21         |
| pMW1255                                      | pAT28 carrying <i>ef_3129</i> ; <i>Ej</i> /PBXP complementation vector; Spec <sup>R</sup>                                                                                                                                                               | This study |
| pZXL5Tet <sup>®</sup>                        | Nisin-inducible <i>mariner</i> transposon delivery vector; Cm <sup>R</sup> , Tet <sup>R</sup>                                                                                                                                                           | 13         |

\*Abbreviations: Carb<sup>R</sup>, carbenicillin resistance; Cm<sup>R</sup>, chloramphenicol resistance; Erm<sup>R</sup>, erythromycin resistance; Kan<sup>R</sup>, kanamycin resistance; Spec<sup>R</sup>, spectinomycin resistance; Tet<sup>R</sup>, tetracycline resistance; Van<sup>R</sup>, vancomycin resistance.

<sup>†</sup> SgtB is also known as Mgt1.

<sup>‡</sup> SgtB<sup>Y181D</sup> is abbreviated as SgtB\* in the main text.

<sup>®</sup> Full details of this plasmid will be disclosed in a subsequent publication.

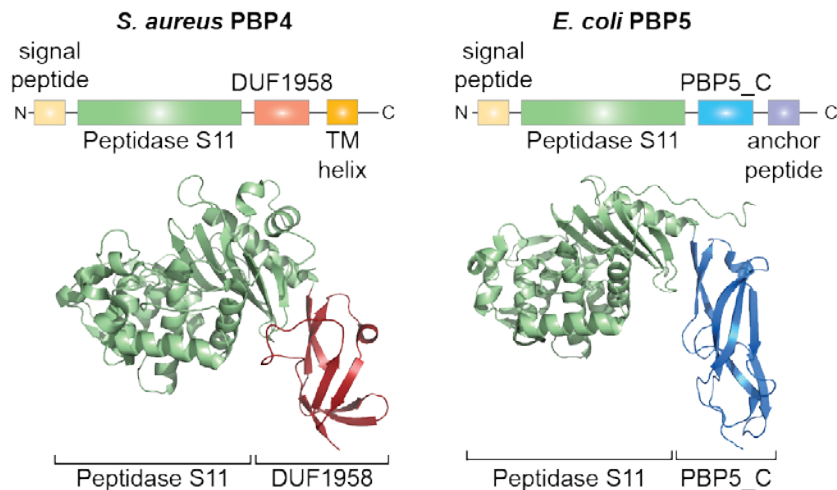

**Figure S1:** Structure and domain organization of the low molecular weight PBPs *S. aureus* PBP4 (PDB, 1TVF) and *E. coli* PBP5 (PDB, 1NZO). Low molecular weight PBPs are often annotated as carboxypeptidases based on the presence of the Peptidase S11 catalytic domain (Pfam, PF00768).<sup>22</sup> PBPs with the widely distributed PBP5\_C domain (Pfam, PF07943) are anchored to the plasma membrane via an amphipathic peptide.<sup>23</sup> In contrast, PBPs with a DUF1958 domain (Pfam, PF09211) are always anchored via a putative 1-2 pass  $\alpha$ -helical transmembrane domain.

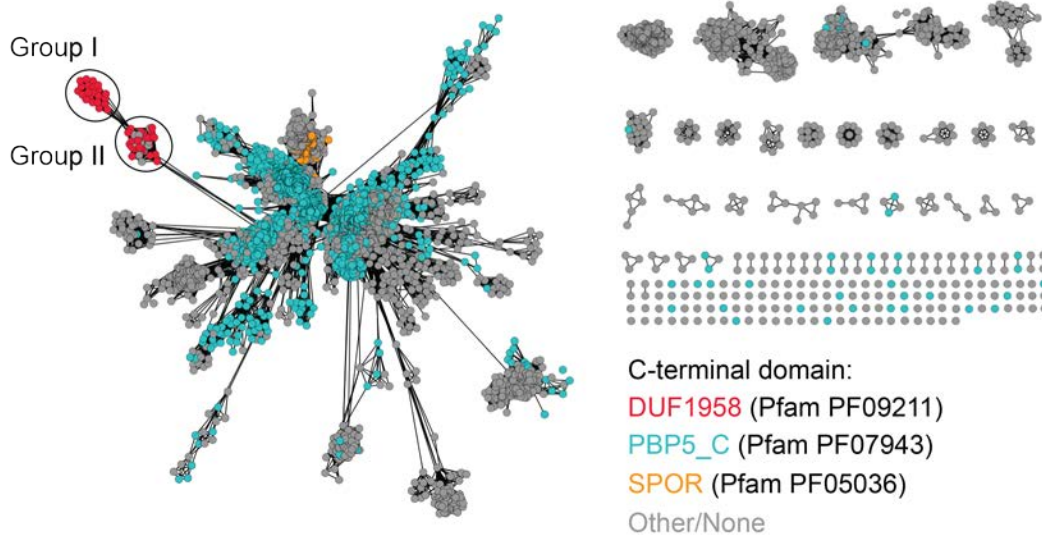

**Figure S2:** Full sequence similarity network of the Peptidase S11 Pfam family. “Edges” (lines) are drawn between PBP nodes with  $\geq 40\%$  sequence identity in the catalytic domain. PBP nodes are colored if they possess an annotated C-terminal domain. Candidate transpeptidases (those containing DUF1958 domains) cluster into two groups. Group I contains staphylococcal PBPs (including *Sa*PBP4), and Group II contains primarily enterococcal/streptococcal PBPs (including *Ef*PBPX and *Sg*PBPX).

We note that groups I and II contain no PBPs with a PBP5\_C domain at the C-terminus. PBPs with a DUF1958 C-terminal domain are only found in groups I and II. In building the SSN, our alignment analysis was restricted to only the Peptidase S11 catalytic domain; thus, the PBPs cluster only due to sequence similarity in the catalytic domain (i.e. independently of their C-terminal domain).

**Table S2: Bacteria carrying PBPs with a DUF1958 C-terminal domain.<sup>a</sup>**

| Species                                | Strain                       | NCBI Accession Number (Genome Locus Tag) |
|----------------------------------------|------------------------------|------------------------------------------|
| <i>Enterococcus avium</i>              | ATCC 14025                   | WP_049222131                             |
| <i>Enterococcus caccae</i>             | ATCC BAA-1240                | WP_010770427                             |
| <i>Enterococcus faecalis</i>           | V583                         | NP_816737 ( <i>EF_3129</i> )             |
| <i>Enterococcus gilvus</i>             | ATCC BAA-350                 | WP_010781795                             |
| <i>Enterococcus haemoperoxidus</i>     | ATCC BAA-382                 | WP_010761910                             |
| <i>Enterococcus malodoratus</i>        | ATCC 43197                   | WP_010743085                             |
| <i>Enterococcus moraviensis</i>        | ATCC BAA-383                 | WP_010766468                             |
| <i>Enterococcus pallens</i>            | ATCC BAA-351                 | WP_010760028                             |
| <i>Enterococcus raffinosus</i>         | ATCC 49464                   | EOH74842                                 |
| <i>Enterococcus saccharolyticus</i>    | ATCC 43076                   | WP_016173926                             |
| <i>Enterococcus silesiacus</i>         | LMG 23085                    | ALS02237 ( <i>ATZ33_12835</i> )          |
| <i>Granulicatella elegans</i>          | ATCC 700633                  | EEW93669                                 |
| <i>Granulicatella adiacens</i>         | ATCC 49175                   | WP_005605320                             |
| <i>Macrococcus caseolyticus</i>        | JCSC5402                     | BAH16867 ( <i>MCCL_0160</i> )            |
| <i>Ruminococcus gnavus</i>             | AGR2154                      | WP_024852514                             |
| <i>Streptococcus anginosus</i>         | C1051                        | AGU81318 ( <i>SAIN_0565</i> )            |
| <i>Streptococcus constellatus</i>      | subsp. <i>pharyngis</i> C818 | AGU74190 ( <i>SCR2_0583</i> )            |
| <i>Streptococcus cristatus</i>         | AS 1.3089                    | AGK71514 ( <i>I872_07150</i> )           |
| <i>Streptococcus gordonii</i>          | V288 (Challis)               | ABV11076 ( <i>SGO_1585</i> )             |
| <i>Streptococcus intermedius</i>       | JTH08                        | BAM23168 ( <i>SCIM_0514</i> )            |
| <i>Streptococcus parasanguinis</i>     | ATCC 15912                   | AEH55220 ( <i>HMPREF0833_10189</i> )     |
| <i>Streptococcus salivarius</i>        | CCHSS3                       | CCB93371 ( <i>SALIVB_1083</i> )          |
| <i>Streptococcus sanguinis</i>         | SK36                         | YP_001034730 ( <i>SSA_0747</i> )         |
| <i>Streptococcus sinensis</i>          | HKU4                         | WP_037614491                             |
| <i>Streptococcus sp.</i> DD10          | DD10                         | KXT74061                                 |
| <i>Streptococcus sp.</i> DD11          | DD11                         | KXT82656                                 |
| <i>Staphylococcus aureus</i>           | Newman                       | BAF66884 ( <i>NWMN_0612</i> )            |
| <i>Staphylococcus carnosus</i>         | TM300                        | CAL27204 ( <i>SCA_0291</i> )             |
| <i>Staphylococcus haemolyticus</i>     | JCSC1435                     | BAE05563                                 |
| <i>Staphylococcus hyicus</i>           | ATCC 11249                   | AJC96827 ( <i>SHYC_10495</i> )           |
| <i>Staphylococcus lugdunensis</i>      | N920143                      | CCB54680 ( <i>SLUG_21560</i> )           |
| <i>Staphylococcus massiliensis</i>     | S46                          | WP_009384485                             |
| <i>Staphylococcus microti</i>          | DSM 22147                    | WP_044360342                             |
| <i>Staphylococcus pasteurii</i>        | SP1                          | AGZ26026 ( <i>STP1_1728</i> )            |
| <i>Staphylococcus pettenkoferi</i>     | VCU012                       | WP_049408040                             |
| <i>Staphylococcus pseudintermedius</i> | HKU10-03                     | ADV04881 ( <i>SPSINT_0352</i> )          |
| <i>Staphylococcus saprophyticus</i>    | ATCC 15305                   | BAE19222 ( <i>SSP2077</i> )              |
| <i>Staphylococcus simiae</i>           | CCM 7213                     | WP_002465256                             |
| <i>Staphylococcus warneri</i>          | SG1                          | AGC91338 ( <i>A284_10115</i> )           |
| <i>Vagococcus lutrae</i>               | LBD1                         | WP_023606004                             |

<sup>a</sup> Proteins were identified from the DUF1958 Pfam entry (Pfam PF09211) or via BLAST search using the *S. aureus* PBP4, *E. faecalis* PBPX, or *S. gordonii* PBPX DUF1958 domain as the query sequence.

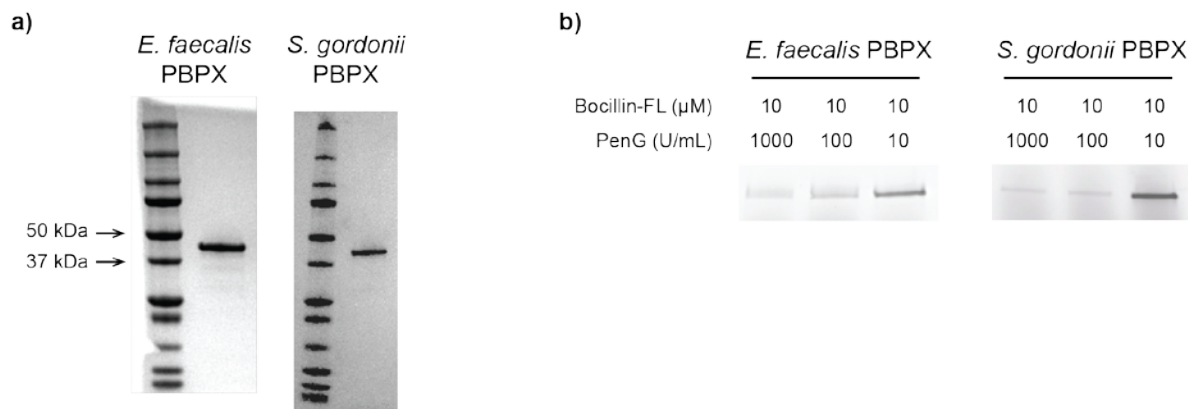

**Figure S3:** Expression and purification of *E. faecalis* EF\_3129 (*Ef*PBPX) and *S. gordonii* SGO\_1585 (*Sg*PBPX). (a) Coomassie-stained gels of purified protein with 1 μg total loading. (b) Bocillin-FL-binding assays to confirm proper PBP folding. PBPs (2.5 μM) were incubated with Bocillin-FL and PenG in assay buffer (see Methods). After SDS-PAGE, Bocillin-FL was imaged by fluorescence scanning via Typhoon. The competitive binding of Bocillin-FL indicates that the PBP catalytic domain is folded.

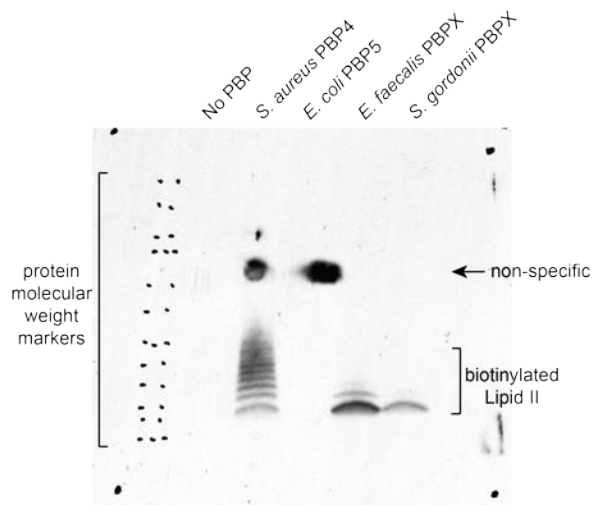

**Figure S4:** Full western blot from Figure 3a showing biotinylation of *S. aureus* Lipid II. *S. aureus* Lipid II was incubated with BDL and the indicated PBP for 1 h before SDS-PAGE and blotting with streptavidin-HRP.

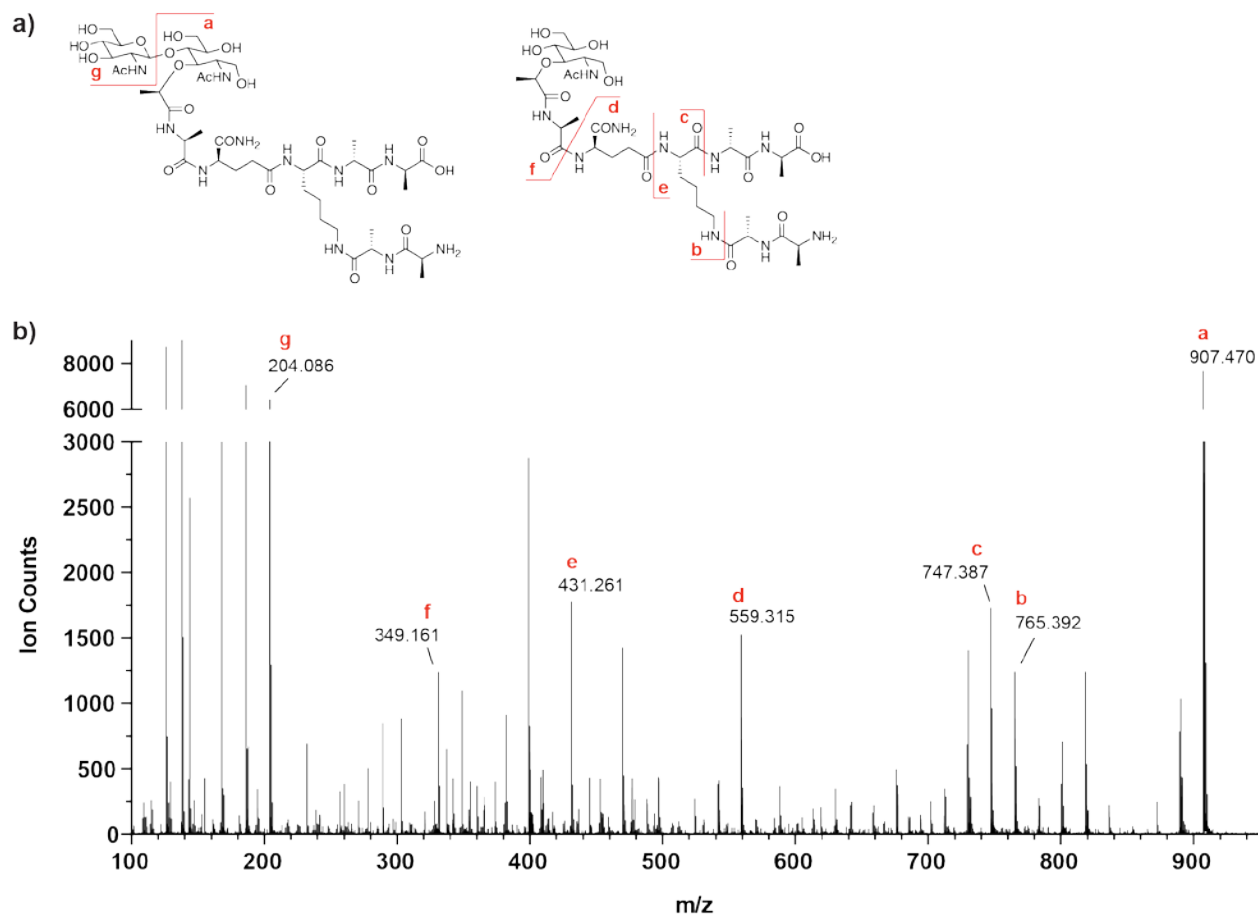

**Figure S5:** Targeted MS/MS of Lipid II extracted from *E. faecalis* (**2**, Figure 1a). Lipid II was polymerized with SgtB and digested with mutanolysin before LC-MS/MS analysis. The  $[M]^{+2}$  ion was targeted for fragmentation.



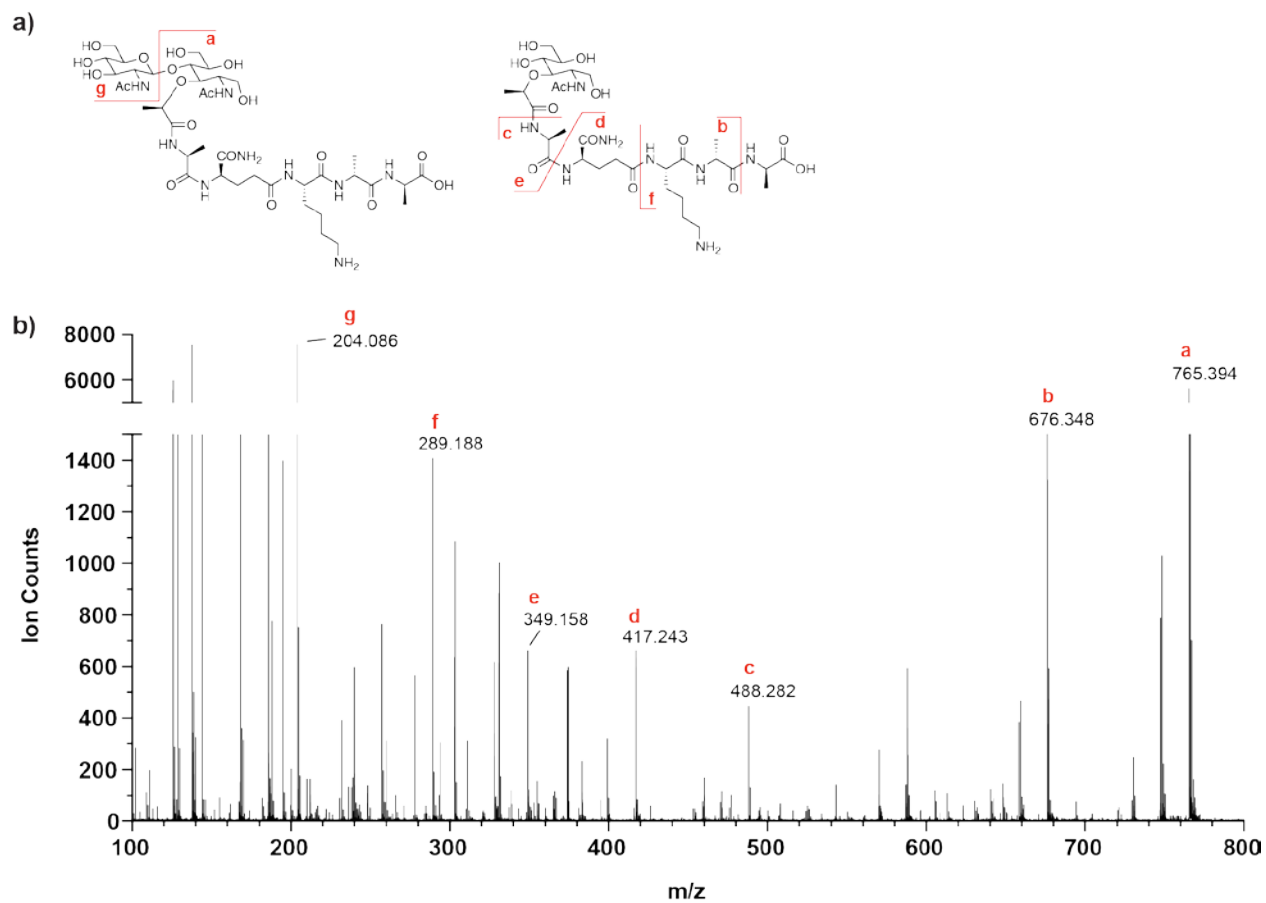

**Figure S6:** Targeted MS/MS of Lipid II extracted from *S. pneumoniae*  $\Delta$ murMN (**3**, Figure 1a). Lipid II was polymerized with SgtB and digested with mutanolysin before LC-MS/MS analysis. The  $[M]^{+2}$  ion was targeted for fragmentation.

a)

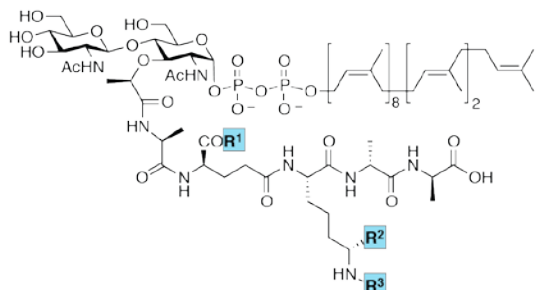

| Entry | Species              | Genotype     | R <sup>1</sup>   | R <sup>2</sup>     | R <sup>3</sup>   |
|-------|----------------------|--------------|------------------|--------------------|------------------|
| 1     | <i>S. aureus</i>     | WT           | -NH <sub>2</sub> | -H                 | Gly <sub>5</sub> |
| 2     | <i>E. faecalis</i>   | WT           | -NH <sub>2</sub> | -H                 | L-Ala-L-Ala      |
| 3     | <i>S. pneumoniae</i> | <i>murMN</i> | -NH <sub>2</sub> | -H                 | -H               |
| 4     | Synthetic            | -            | -OH              | -H                 | -H               |
| 5     | <i>E. coli</i>       | WT           | -OH              | -COOH              | -H               |
| 6     | <i>B. subtilis</i>   | WT           | -OH              | -CONH <sub>2</sub> | -H               |

b)

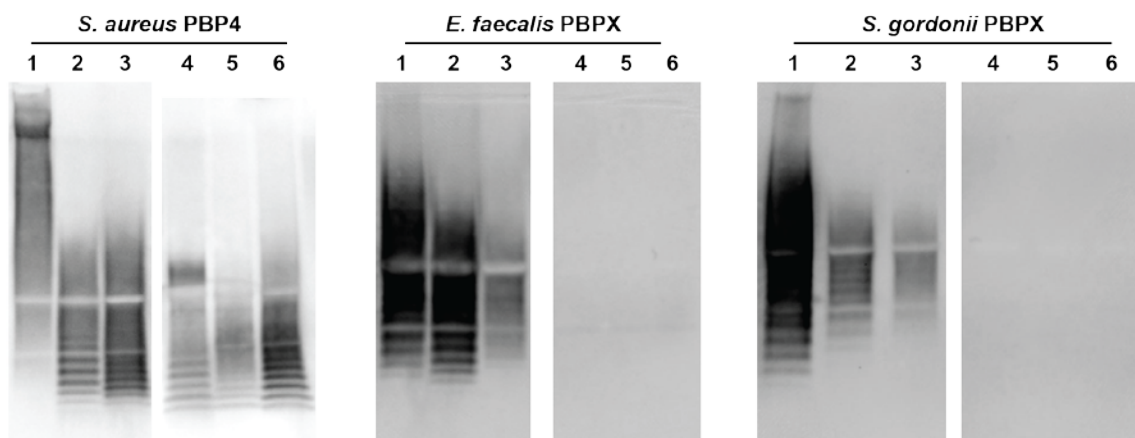

**Figure S7:** The low molecular weight PBPs are promiscuous toward peptidoglycan substrates. (a) Structures of the Lipid IIs tested. (b) Western blots showing biotinylation of peptidoglycan substrates. Lipid II (3  $\mu$ M of **1**, **2**, **3** or 20  $\mu$ M of **4**, **5**, **6**) was polymerized with SgtB<sup>Y181D</sup> (5  $\mu$ M) for 30 min before incubation with BDL (3 mM) and the indicated PBP (5  $\mu$ M). The reaction products were separated via SDS-PAGE and detected by blotting with streptavidin-HRP.

We note that when *S. aureus* Lipid II (**1**) is labeled using *Sa*PBP4, crosslinking of peptidoglycan competes with BDL labeling. As a result, the BDL-labeled peptidoglycan runs higher in the gel and with ill-defined bands.

The starting concentration of Lipid II used in labeling polymer generated from **4**, **5**, and **6** was raised to enable detection via western blot. *Sa*PBP4 will label polymer generated from these substrates, which bear iso-Glu at the second position of the stem peptide, albeit at a lower level than **1**, **2**, or **3**, which contain iso-Gln at the second position. We did not detect biotinylation of polymer generated from **4**, **5**, or **6** using *Ef*PBPX or *Sg*PBPX even at higher Lipid II concentrations.

*Ef*PBPX and *Sg*PBPX also appear to prefer substrates bearing branch residues on lysine (R<sup>3</sup>, above), as evidenced by the weaker labeling of **3**, which has no branch, relative to **1** and **2**. These PBPs evidently recognize the stem peptide branch even though these residues are over 8 bonds away from the terminal D-Ala, the site of reactivity.

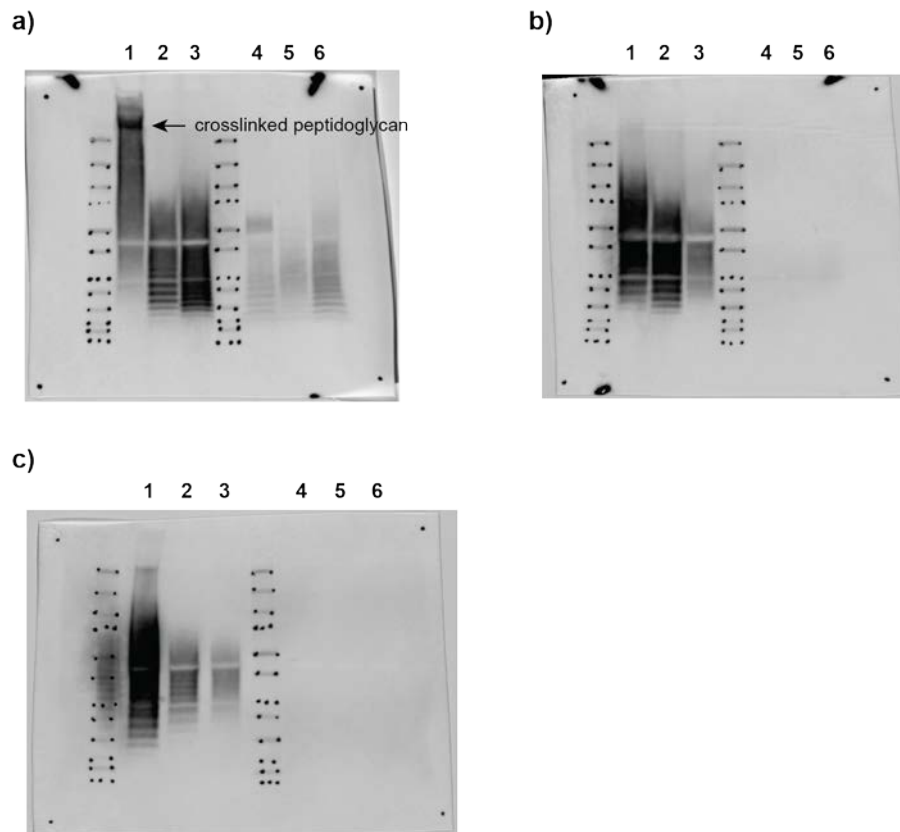

**Figure S8:** Full western blots from Figure S7 showing biotinylation of peptidoglycan with varying stem peptide structures. Lipid II was labeled using (a) *S. aureus* PBP4, (b) *E. faecalis* PBPX, or (c) *S. gordonii* PBPX. Blots were exposed for 10 s (a) or 1 min (b and c). Lane numbers indicate the Lipid II structure used (see main text Figure 1a or Figure S7).

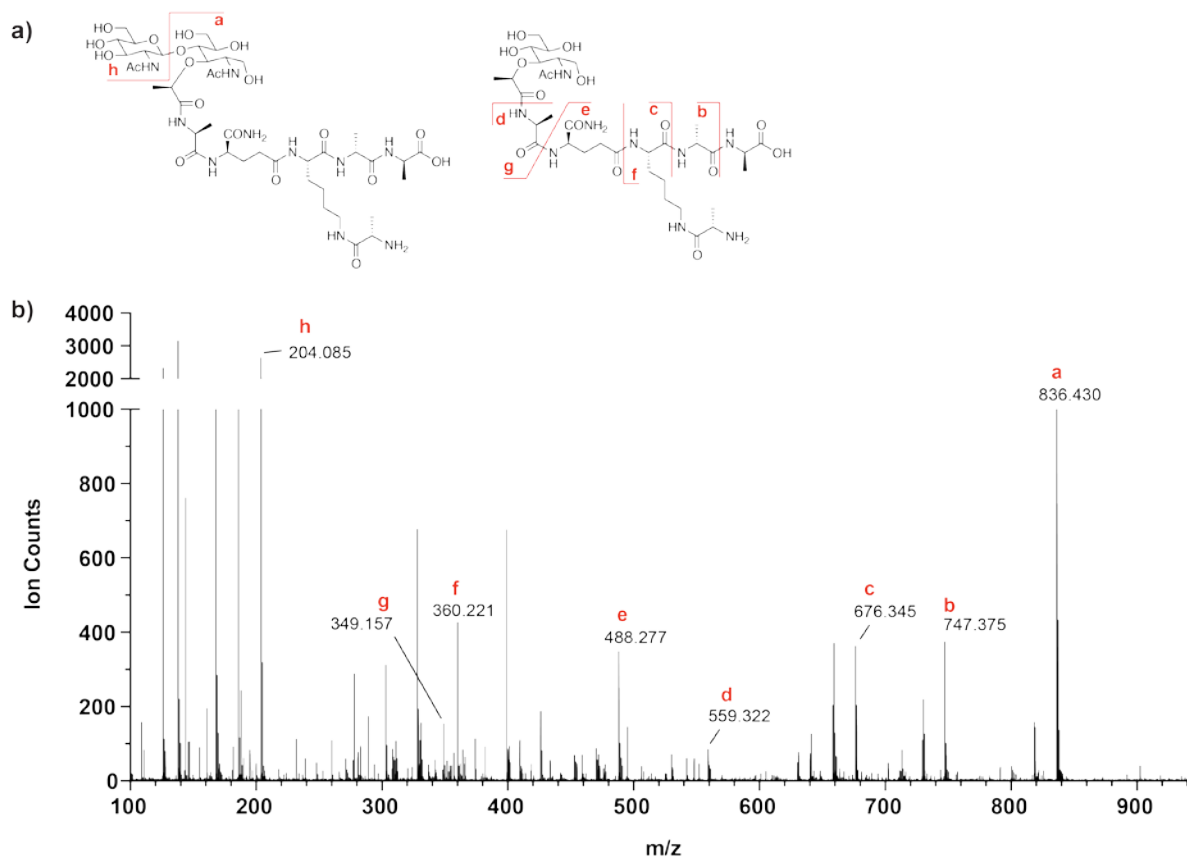

**Figure S9:** Targeted MS/MS of Lipid II extracted from *E. faecalis* Tn:*murN* (**9**, Figure S10). Lipid II was polymerized with SgtB and digested with mutanolysin before LC-MS/MS analysis. The  $[M]^{+2}$  ion was targeted for fragmentation.

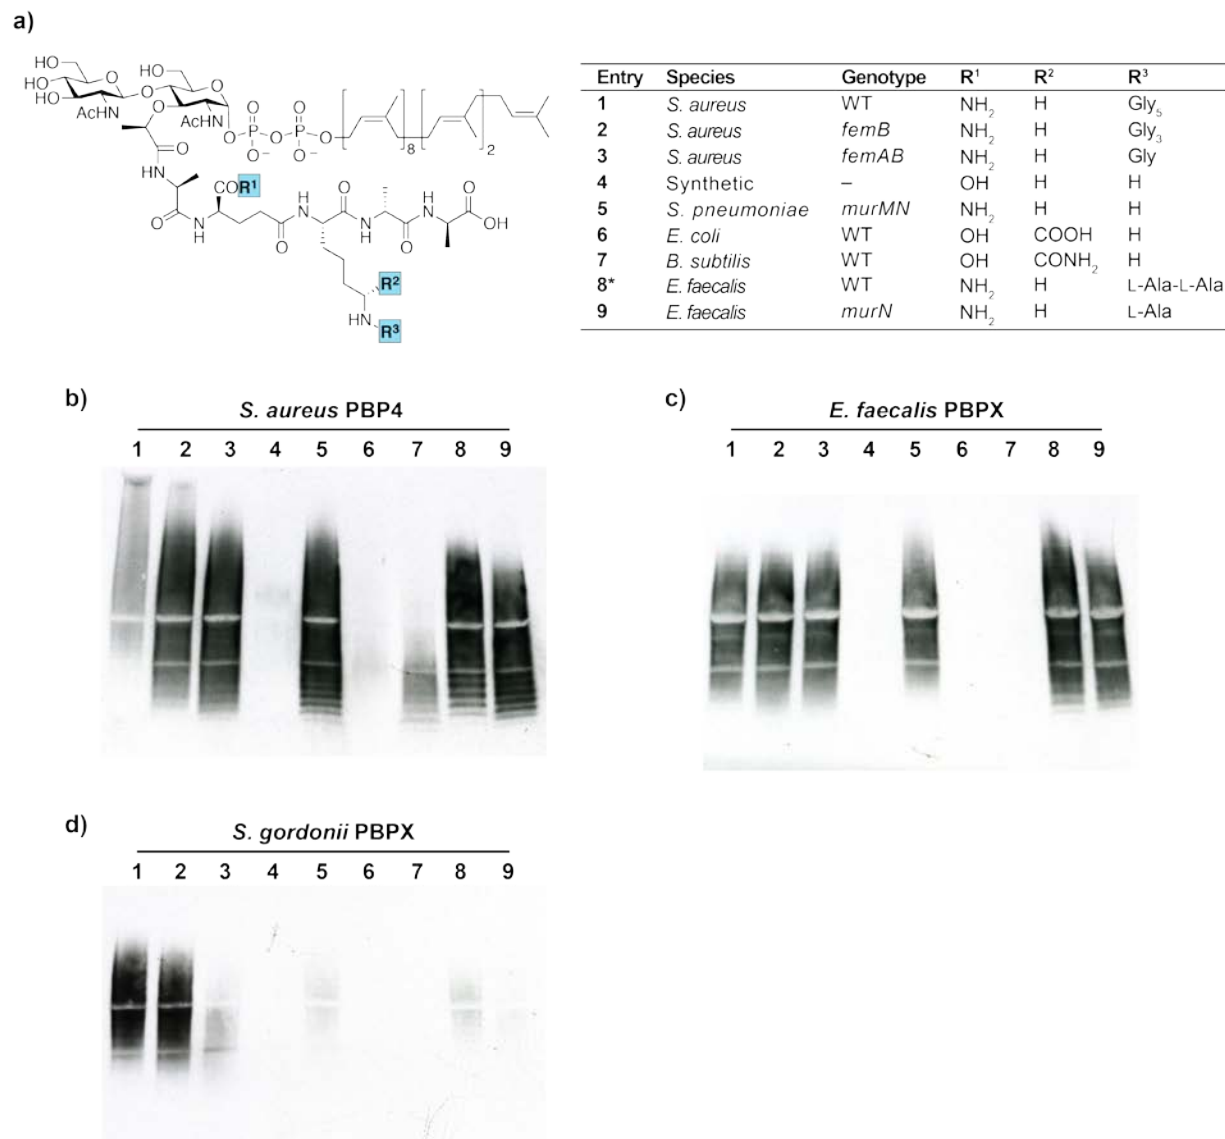

**Figure S10:** *SaPBP4* and *EfPBPX* can label a variety Lipid II substrates. a) The expanded set of Lipid II variants used to test the substrate scope of the low molecular weight PBP transpeptidases. Note: the compound numbering differs from the main text in this figure. The numbering here applies only to Figure S10. We have previously described the isolation of **2** and **3** from *S. aureus* mutants.<sup>1b</sup> \*This substrate is also the native Lipid II in *S. gordonii*. Lipid II (3  $\mu$ M) was polymerized with SgtB<sup>Y181D</sup> (5  $\mu$ M) for 30 min before incubation with BDL (3 mM) and 5  $\mu$ M of *SaPBP4* (b), *EfPBPX* (c), or *SgPBPX* (d).

We note that we observed reduced labeling of polymers generated from synthetic (**4**), *E. coli* (**6**), and *B. subtilis* (**7**) Lipid II using *SaPBP4* in this experiment because only 3  $\mu$ M Lipid II was used in the labeling reaction rather than 20  $\mu$ M as in Figure S7. Higher concentrations of Lipid II were required to detect substantial labeling of these substrates, which contain iso-Glu in the stem peptide, with *SaPBP4*.

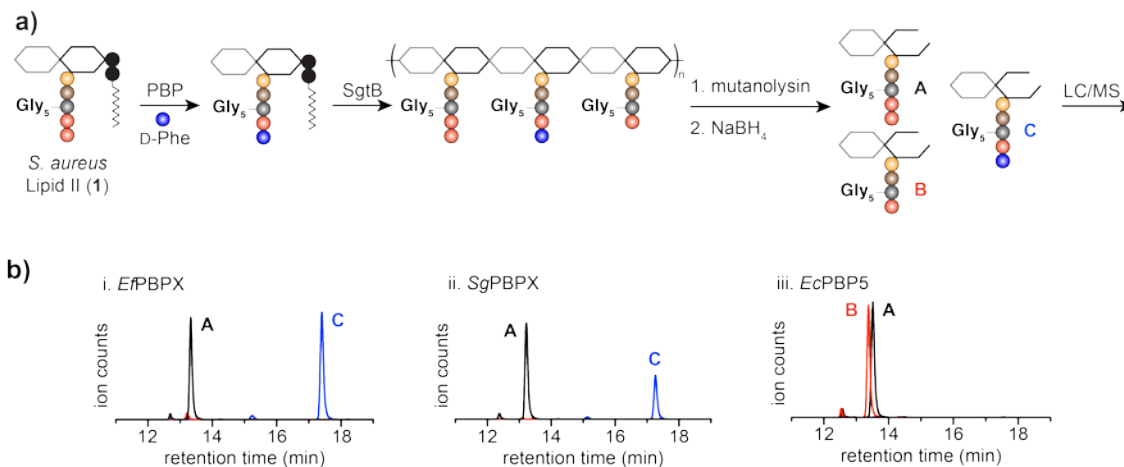

**Figure S11:** *S. aureus* Lipid II labeling reactions with D-Phe. (a) Schematic of Lipid II labeling reactions. *S. aureus* Lipid II (**1**, Figure 1a, 20  $\mu$ M) and D-Phe (4 mM) were incubated with 20  $\mu$ M *E/PBPX*, 20  $\mu$ M *SgPBPX*, or 5  $\mu$ M *EcPBP5* for 1 h. (b) LC-MS extracted ion chromatograms of the D-Phe labeling reactions.

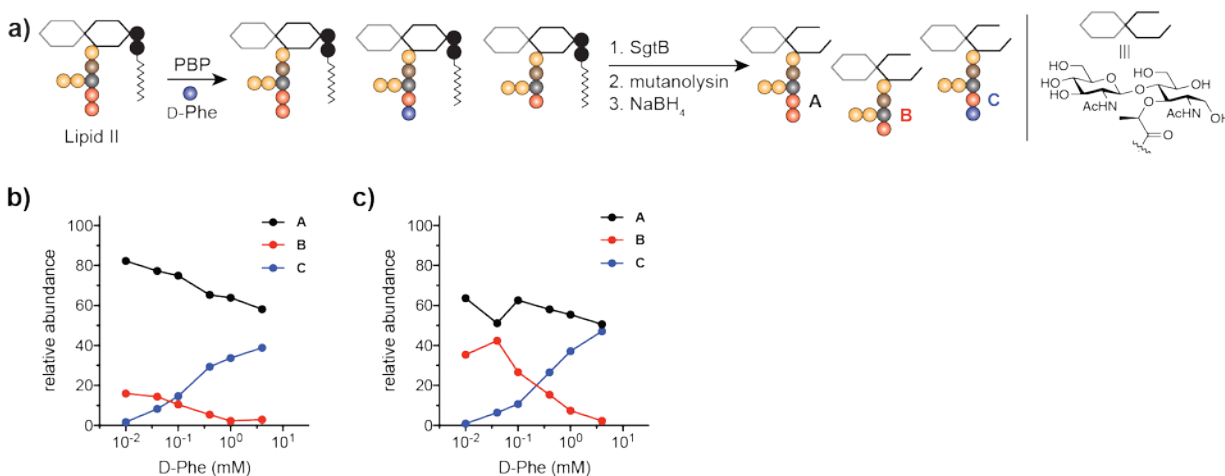

**Figure S12:** Millimolar levels of exogenous D-amino acid are sufficient to suppress hydrolysis. (a) Schematic of D-Phe labeling reactions. Lipid II extracted from *E. faecalis* (2, Figure 1a, 20  $\mu$ M) was incubated with 5  $\mu$ M *Ef*PBPX (b) or *Sa*PBP4 (c) and varying concentrations of D-Phe for 1 h. The reaction products were analyzed by LC-MS and the product masses extracted from the total ion chromatogram. Data points indicate the relative amount of each product as determined by integrating the resulting EICs.

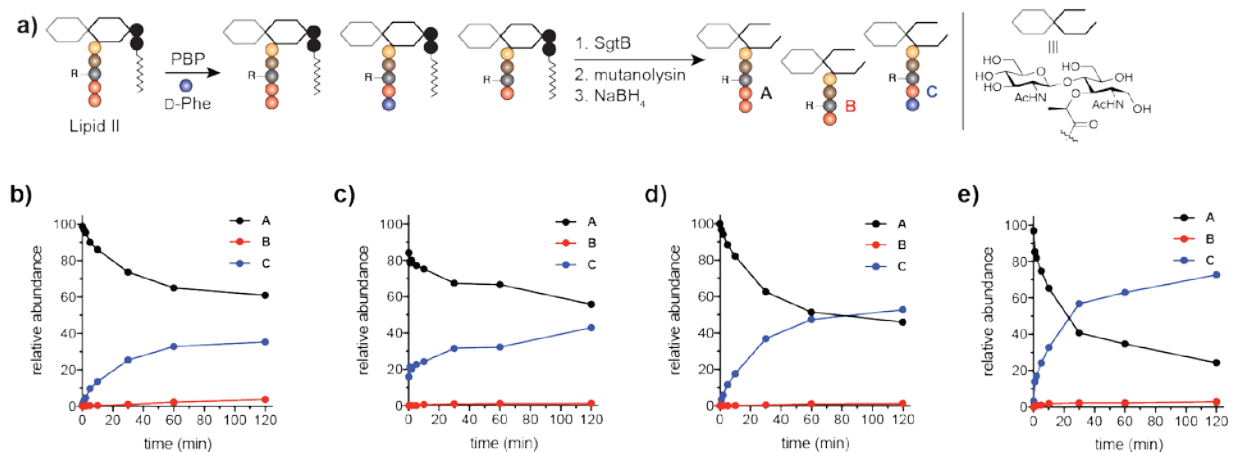

**Figure S13.** Low molecular weight PBPs rapidly exchange D-Phe into Lipid II. (a) Schematic of D-Phe labeling reactions. Lipid II extracted from *S. aureus* (**1**, Figure 1a, 20  $\mu$ M) and D-Phe (4 mM) were incubated with 5  $\mu$ M *EfPBPX* (b) or *SgPBPX* (c) for the indicated time. Analogous reactions were performed with Lipid II extracted from *E. faecalis* (**2**, Figure 1a) and *EfPBPX* (d) or *SaPBP4* (e). The reaction products were analyzed by LC-MS and the product masses extracted from the total ion chromatogram. Data points indicate the relative amount of each product as determined by integrating the resulting extracted ion chromatograms.



**Table S3: *S. aureus* Lipid II (1) Labeling Reactions<sup>a</sup>**

| D-amino acid               | <i>E. faecalis</i> PBPX |              |         | <i>S. gordonii</i> PBPX |              |         |
|----------------------------|-------------------------|--------------|---------|-------------------------|--------------|---------|
|                            | pentapeptide            | tetrapeptide | + label | pentapeptide            | tetrapeptide | + label |
| <b>BDL</b>                 | ND                      | ND           | ND      | ND                      | ND           | ND      |
| <b>D-PG<sup>b</sup></b>    | 7                       | 1            | 92      | 11                      | 0            | 89      |
| <b>F<sub>3</sub>-D-Ala</b> | 8                       | 3            | 89      | 3                       | 1            | 97      |
| <b>D-Ala-d<sub>3</sub></b> | 7                       | 0            | 93      | 11                      | 0            | 89      |

<sup>a</sup> *S. aureus* Lipid II (1, Figure 1A, 8  $\mu$ M) was incubated with PBP (20  $\mu$ M) and the indicated D-amino acid (25 mM) for 1 h. See Methods for full conditions. Values indicate relative abundance of each product as determined by integrating the LC-MS EICs. ND = not determined

<sup>b</sup> D-propargyl glycine

**Table S4: *E. faecalis* Lipid II (2) Labeling Reactions<sup>a</sup>**

| D-amino acid label         | <i>S. aureus</i> PBP4 |              |         | <i>E. faecalis</i> PBPX |              |         |
|----------------------------|-----------------------|--------------|---------|-------------------------|--------------|---------|
|                            | pentapeptide          | tetrapeptide | + label | pentapeptide            | tetrapeptide | + label |
| <b>BDL</b>                 | 19                    | 1            | 80      | 31                      | 4            | 65      |
| <b>D-PG<sup>b</sup></b>    | 39                    | 1            | 60      | 36                      | 3            | 61      |
| <b>F<sub>3</sub>-D-Ala</b> | 45                    | 0            | 55      | 33                      | 9            | 58      |
| <b>D-Ala-d<sub>3</sub></b> | 23                    | 0            | 77      | 45                      | 6            | 49      |

<sup>a</sup> *E. faecalis* Lipid II (2, Figure 1a, 10  $\mu$ M) was incubated with PBPs (10  $\mu$ M) and the indicated D-amino acid (10 mM) for 1 h. See Methods for full conditions. Values indicate relative abundance of each product as determined by integrating the LC-MS EICs.

<sup>b</sup> D-propargyl glycine

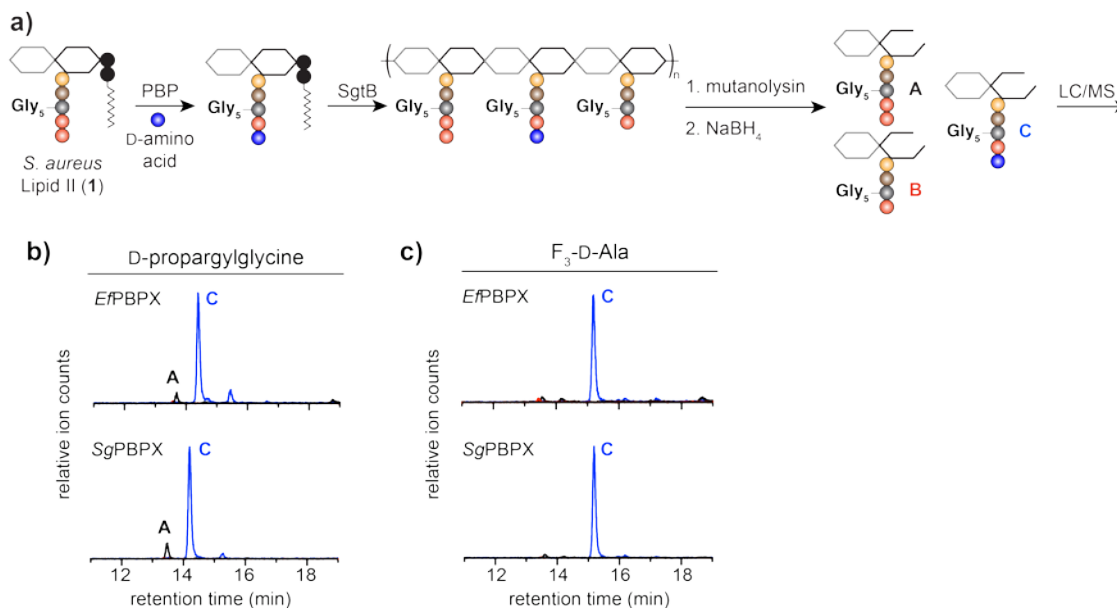

**Figure S14:** Labeling of *S. aureus* Lipid II (1) with D-propargylglycine, and trifluoro-D-Ala. a) Schematic of labeling reactions. See Methods for reaction conditions for each PBP. See Figure S18 for product characterization. LC-MS extracted ion chromatograms of the products of D-propargylglycine (b) and trifluoro-D-Ala (c) labeling reactions.

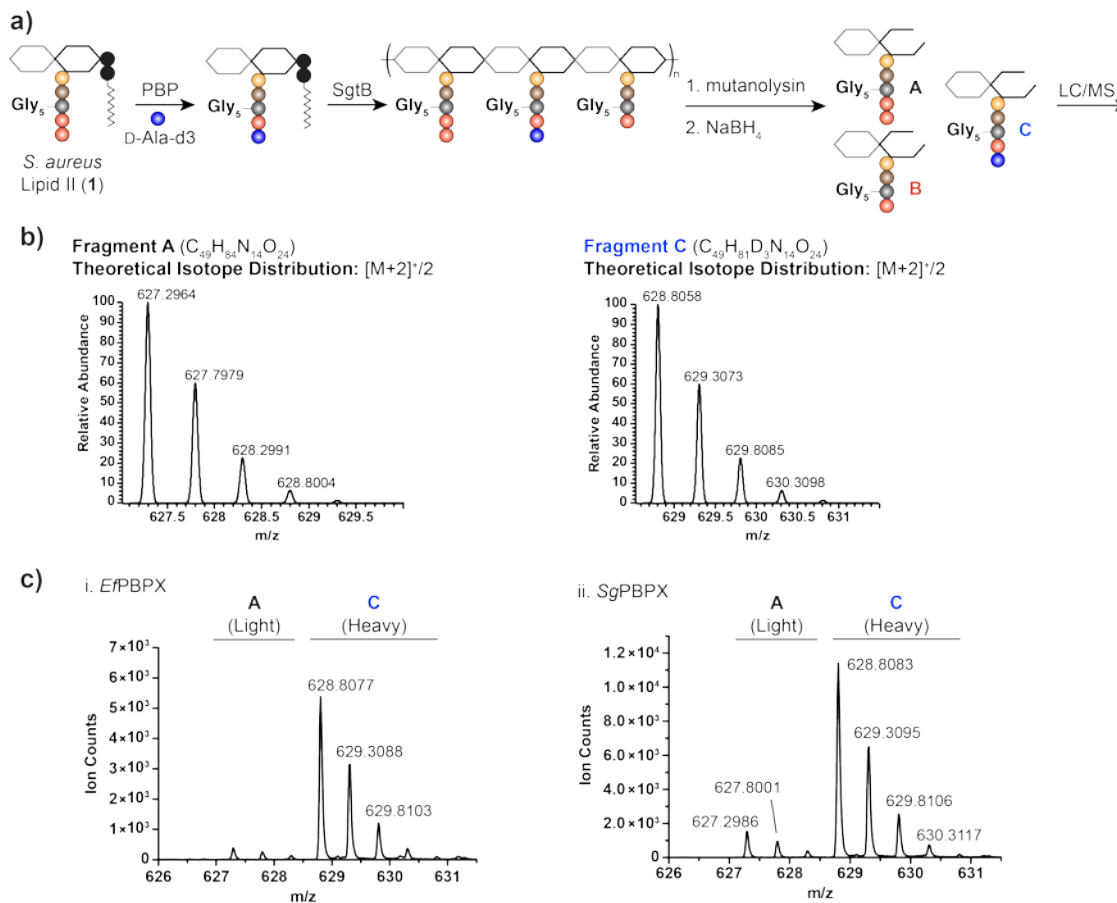

**Figure S15:** Labeling of *S. aureus* Lipid II (2) with D-Ala-d<sub>3</sub>. a) Schematic of labeling reactions. See Methods for reaction conditions. b) Theoretical isotope distributions for unlabeled Lipid II (Fragment A) and deuterated Lipid II (Fragment C). c) MS spectra of reaction products after incubation with *Ej*PBPX (i) or *Sg*PBPX (ii).

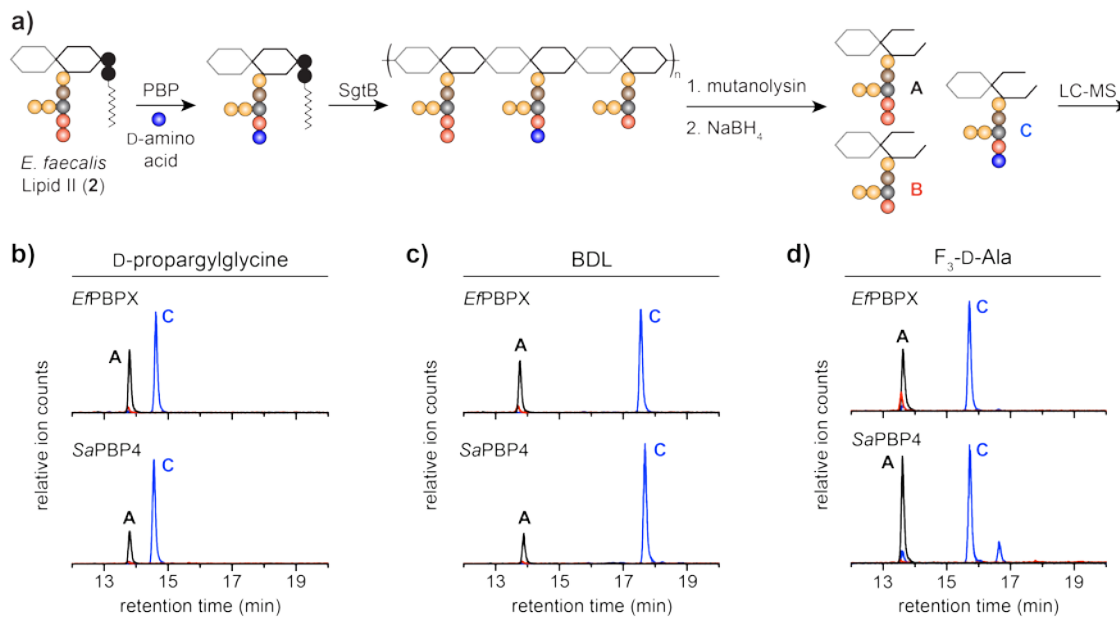

**Figure S16:** Labeling of *E. faecalis* Lipid II (2) with BDL, D-propargylglycine, and trifluoro-D-Ala. a) Schematic of labeling reactions. See Methods for reaction conditions for each PBP. See Figure S19 for product characterization. LC-MS extracted ion chromatograms (EICs) of the products of D-propargylglycine (b), BDL (c), and trifluoro-D-Ala (d) labeling reactions.

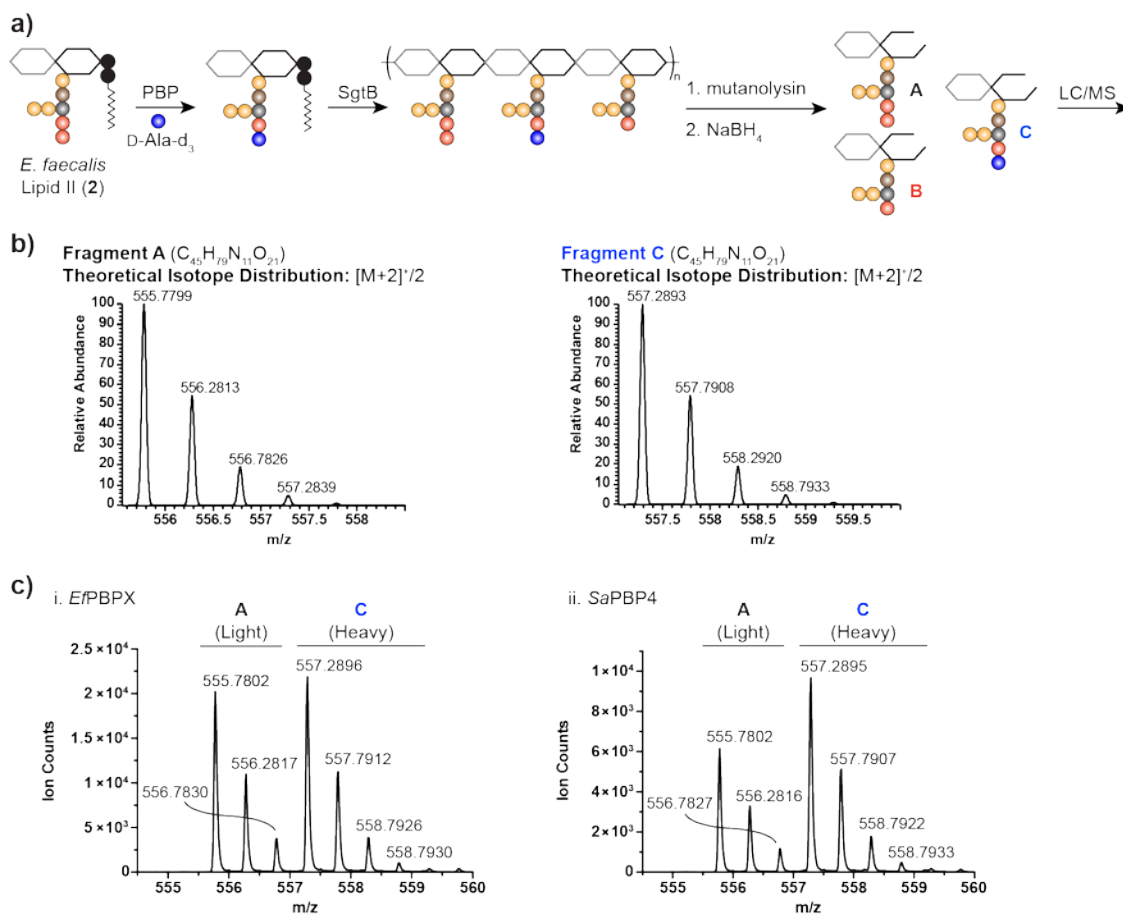

**Figure S17:** Labeling of *E. faecalis* Lipid II (2) with D-Ala-d<sub>3</sub>. a) Schematic of labeling reactions. See Methods for reaction conditions for each PBP. b) Theoretical isotope distributions for unlabeled Lipid II (Fragment A) and deuterated Lipid II (Fragment C). c) MS spectra of reaction products after incubation with *E*/PBPX (i) or *Sa*PBP4 (ii).

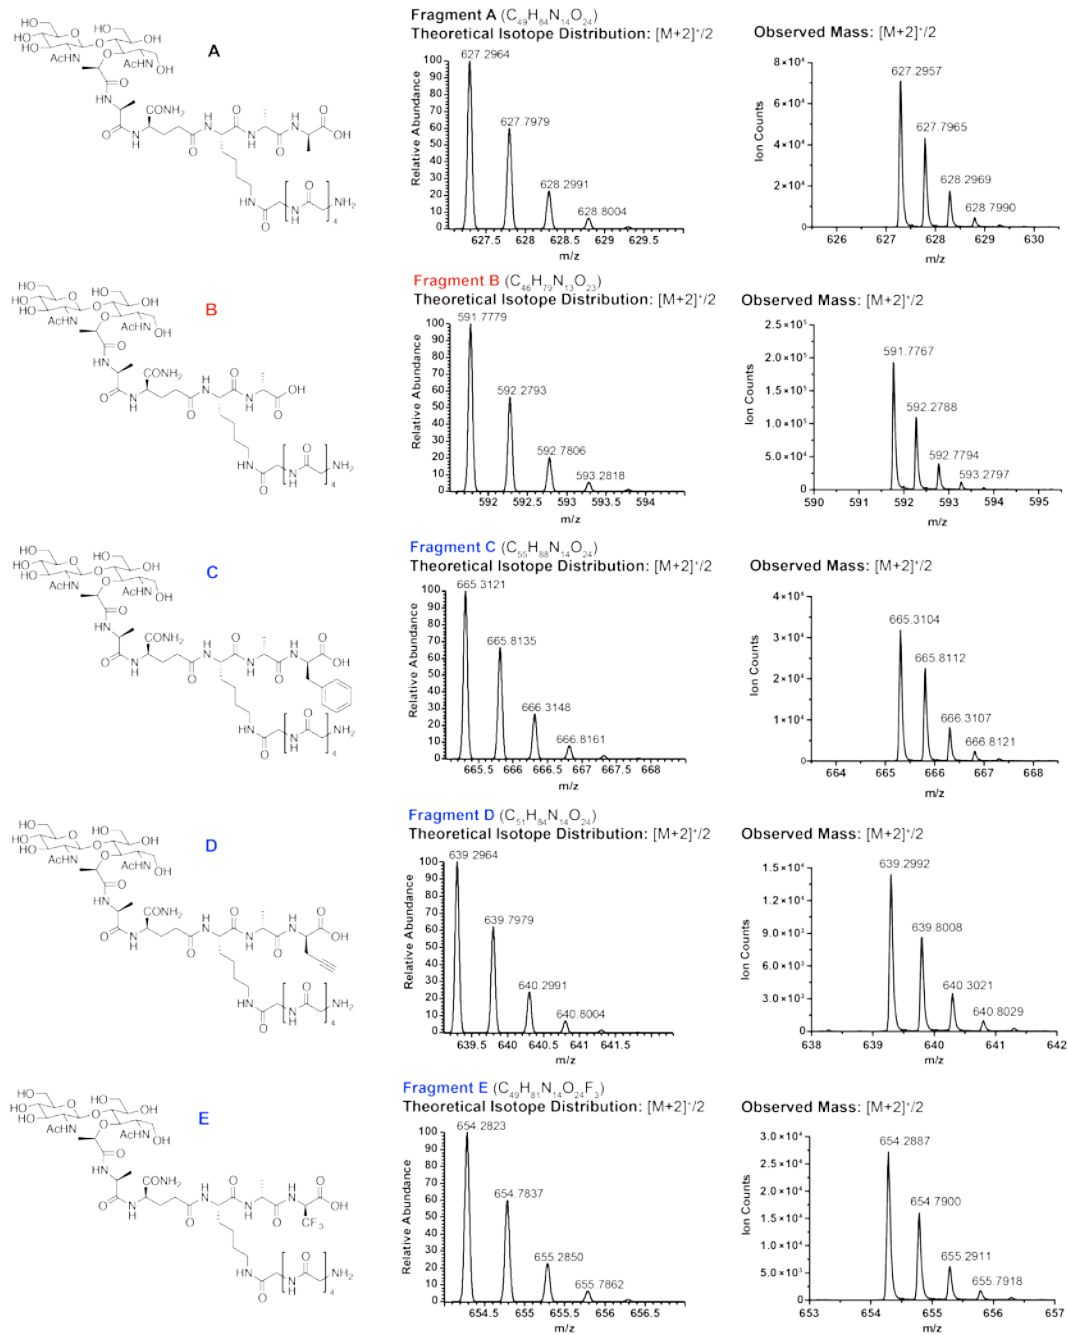

Figure S18: Mass spectra of the mucopeptide products of *S. aureus* Lipid II (1) labeling reactions.

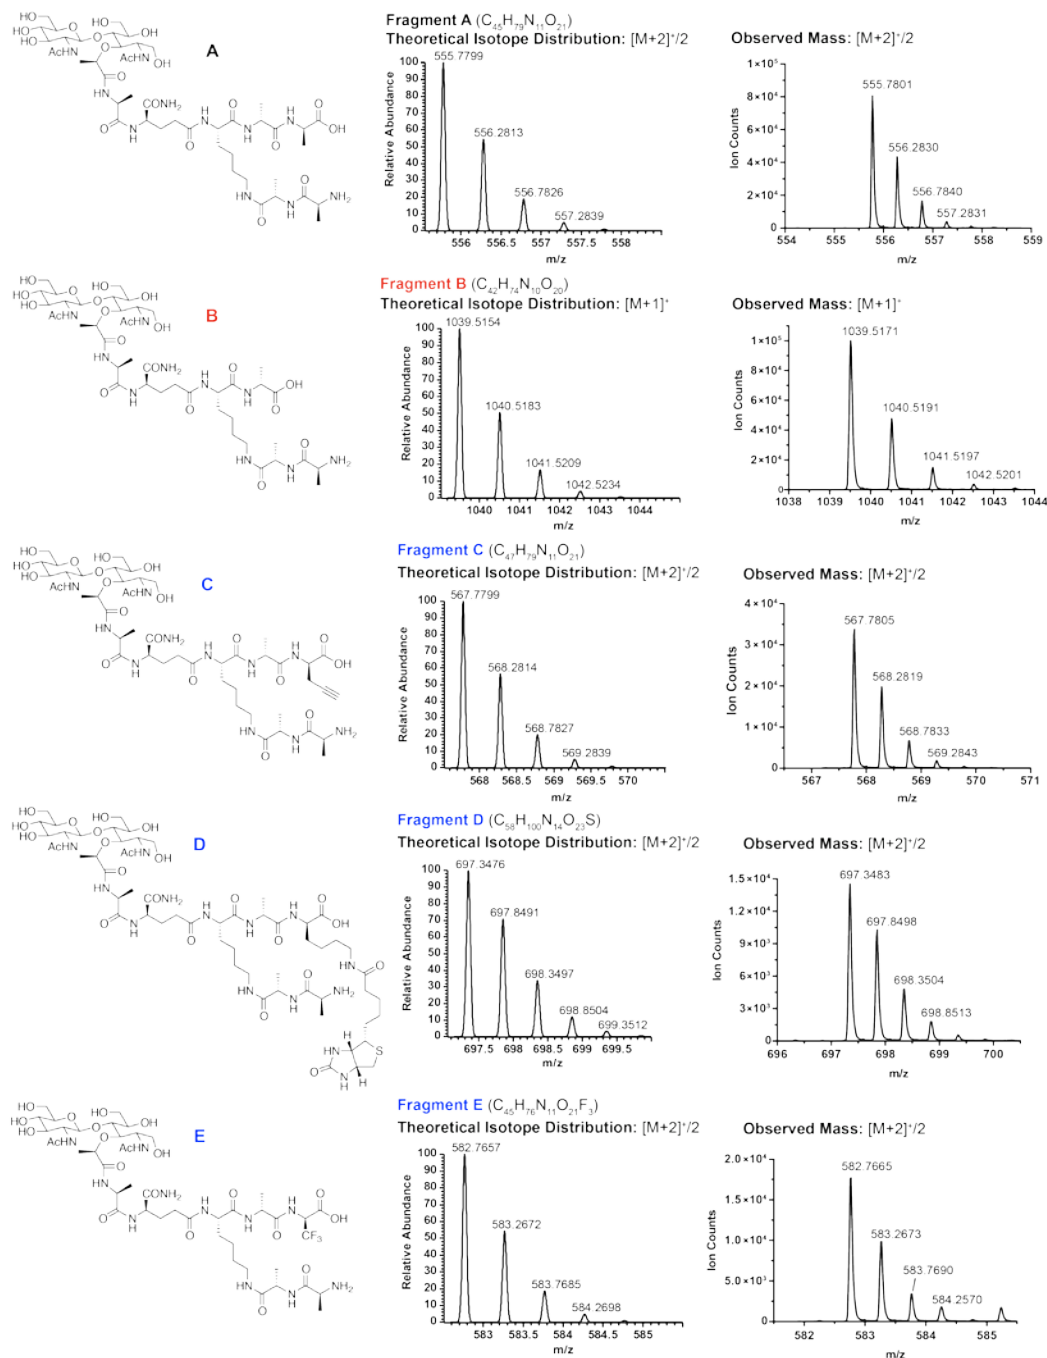

Figure S19: Mass spectra of the mucopeptide products of *E. faecalis* Lipid II (2) labeling reactions.

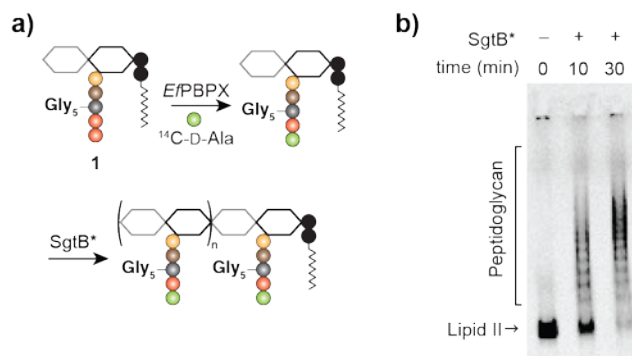

**Figure S20:** *Ef*PBPX can be used to generate radiolabeled *S. aureus* Lipid II and uncrosslinked peptidoglycan oligomers. a) Schematic of exchange of  $[^{14}\text{C}]$ -D-Ala into *S. aureus* Lipid II (1). See Methods for conditions. Radiolabeled products were purified from the excess  $[^{14}\text{C}]$ -D-Ala using a C18 gravity column before polymerization with SgtB\*. b) PAGE-autoradiograph of labeled Lipid II and peptidoglycan oligomers with repeating disaccharide units ranging from 1 to approximately 10.



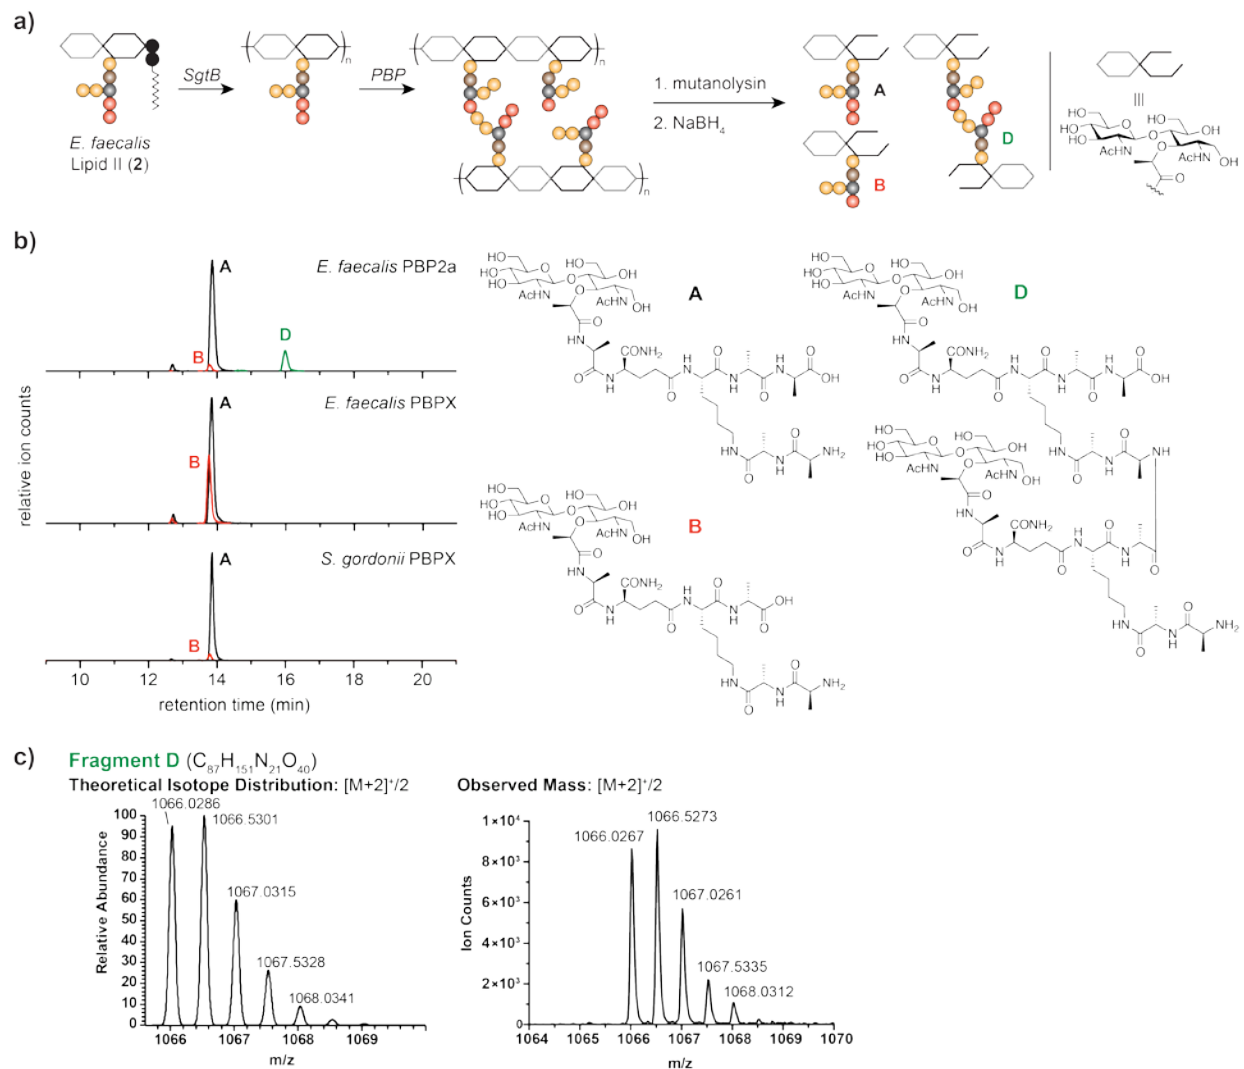

**Figure S21:** *E. faecalis* PBPX and *S. gordonii* PBPX do not crosslink their native substrate. (a) Schematic of peptidoglycan crosslinking reactions. See Methods for reaction conditions. (b) LC-MS extracted ion chromatograms (EICs) of the reaction products after incubating *E. faecalis* peptidoglycan with the indicated PBP. The structures corresponding the extracted masses are indicated. (c) MS spectrum of the crosslinked product **D**. See Figure S19 for MS spectra of products **A** and **B**.

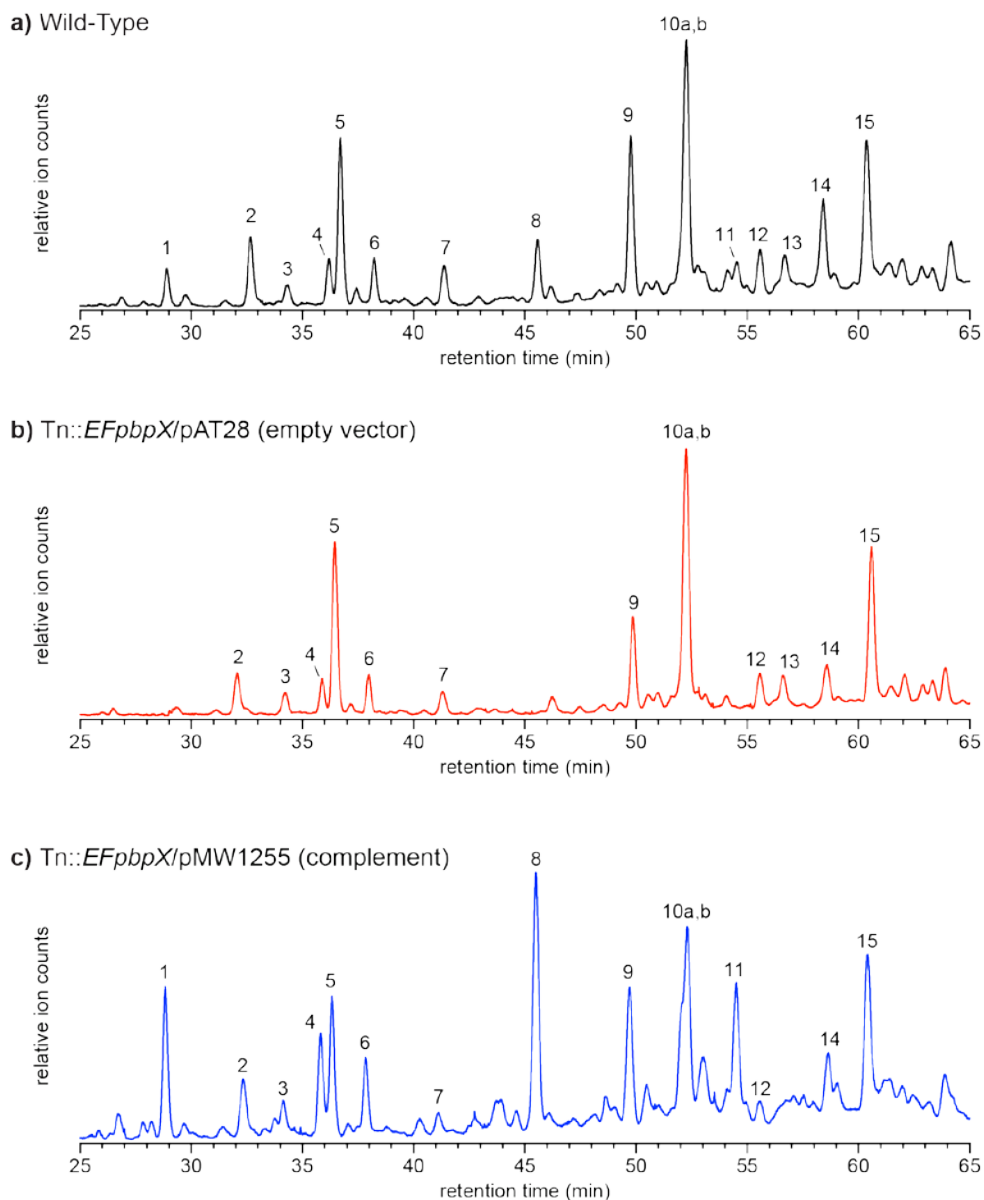

**Figure S22:** Analysis of *E. faecalis* peptidoglycan indicates that *EfPBpX* adds lysine to the cell wall. Peptidoglycan was isolated from wild-type *E. faecalis* MMH594 (a), Tn::*EFpbpX*/pAT28 (empty vector) (b), and Tn::*EFpbpX*/pMW1255 (complement) (c) and digested with mutanolysin. Muropeptides were analyzed by LC-MS. See Table S5 for masses and proposed structures of each peak and Table S6 for relative peak areas within the sample.

The only significant change in the cell wall composition in the absence of *EfPBpX* is the loss of peaks 1, 8, and 11. These peaks are muropeptide monomers, dimers, and trimers, respectively, with masses consistent with exchange of the terminal D-Ala on the stem peptide with lysine (Table S5). We did not observe substantial changes in the relative amount of crosslinking when *EfPBpX* is deleted (Table S6).

**Table S5: Muropeptide masses detected in *E. faecalis* cell wall digests**

| Peak       | Observed Mass (charge)               | Order   | Proposed Stem Peptide Sequence                          |
|------------|--------------------------------------|---------|---------------------------------------------------------|
| <b>1</b>   | 1167.61 (1), 584.31 (2)              | Monomer | L-Ala-D-isoGln-L-Lys-(L-Ala-L-Ala)-D-Ala-Lys            |
| <b>2</b>   | 968.48 (1), 484.74 (2)               | Monomer | peak 5 lacking two alanines                             |
| <b>3</b>   | 1039.52 (1), 520.26 (2)              | Monomer | isomer of peak 4                                        |
| <b>4</b>   | 1039.52 (1), 520.26 (2)              | Monomer | L-Ala-D-isoGln-L-Lys-(L-Ala-L-Ala)-D-Ala                |
| <b>5</b>   | 1110.55 (1), 555.78 (2)              | Monomer | L-Ala-D-isoGln-L-Lys-(L-Ala-L-Ala)-D-Ala-D-Ala          |
| <b>6</b>   | 1110.55 (1), 555.78 (2)              | Monomer | isomer of peak 5                                        |
| <b>7</b>   | 1111.54 (1), 556.27 (2)              | Monomer | L-Ala- <b>D-isoGlu</b> -L-Lys-(L-Ala-L-Ala)-D-Ala-D-Ala |
| <b>8</b>   | 1094.56 (2), 730.04 (3)              | Dimer   | crosslink of peaks 1 and 5                              |
| <b>9</b>   | 994.99 (2), 663.66 (3)               | Dimer   | crosslink of peaks 2 and 5                              |
| <b>10a</b> | 1030.51 (2), 687.34 (3)              | Dimer   | crosslink of peaks 4 and 5                              |
| <b>10b</b> | 1066.03 (2), 711.02 (3)              | Dimer   | crosslinked dimer of peak 5                             |
| <b>11</b>  | 1070.21 (3), 802.91 (4)              | Trimer  | crosslink of peaks 5, 5, and 1                          |
| <b>12</b>  | 1066.52 (2), 711.35 (3)              | Dimer   | crosslink of peaks 5 and 7                              |
| <b>13</b>  | 1066.52 (2), 711.35 (3)              | Dimer   | isomer of peak 12                                       |
| <b>14</b>  | 1505.24 (2), 1003.83 (3), 753.13 (4) | Trimer  | crosslink of peaks 5, 5, and 2                          |
| <b>15</b>  | 1576.28 (2), 1051.19 (3), 788.64 (4) | Trimer  | crosslinked trimer of peak 5                            |

**Table S6: Relative abundance of muropeptide peaks in the *E. faecalis* cell wall<sup>a</sup>**

| Peak         | Monomers  |                    | Peak         | Dimers    |                    | Peak         | Trimers   |                    |
|--------------|-----------|--------------------|--------------|-----------|--------------------|--------------|-----------|--------------------|
|              | Wild-Type | Tn:: <i>EFpbpX</i> |              | Wild-Type | Tn:: <i>EFpbpX</i> |              | Wild-Type | Tn:: <i>EFpbpX</i> |
| <b>1</b>     | 5         | 0                  | <b>8</b>     | 6         | 0                  | <b>11</b>    | 2         | 0                  |
| <b>4</b>     | 6         | 5                  | <b>10a</b>   | 28        | 34                 | <b>15</b>    | 8         | 10                 |
| <b>5</b>     | 30        | 37                 | <b>10b</b>   | 3         | 2                  |              |           |                    |
| <b>7</b>     | 5         | 4                  | <b>12</b>    | 4         | 4                  |              |           |                    |
|              |           |                    | <b>13</b>    | 3         | 4                  |              |           |                    |
| <b>Total</b> | 46        | 46                 | <b>Total</b> | 44        | 44                 | <b>Total</b> | 10        | 10                 |

<sup>a</sup>Values were calculated by first extracting the peak mass from the total ion chromatogram, integrating the resulting EIC peak area, and dividing by the sum of all the muropeptide peak areas within each sample. Only peaks that could be unequivocally assigned as monomers/dimers/trimers (not derived from cleavage of crosslinks) were included in the analysis. We also found no reduction in crosslinking in the absence of *EFBPX* when total peptidoglycan crosslinking was calculated using the method of Glauner.<sup>24</sup>

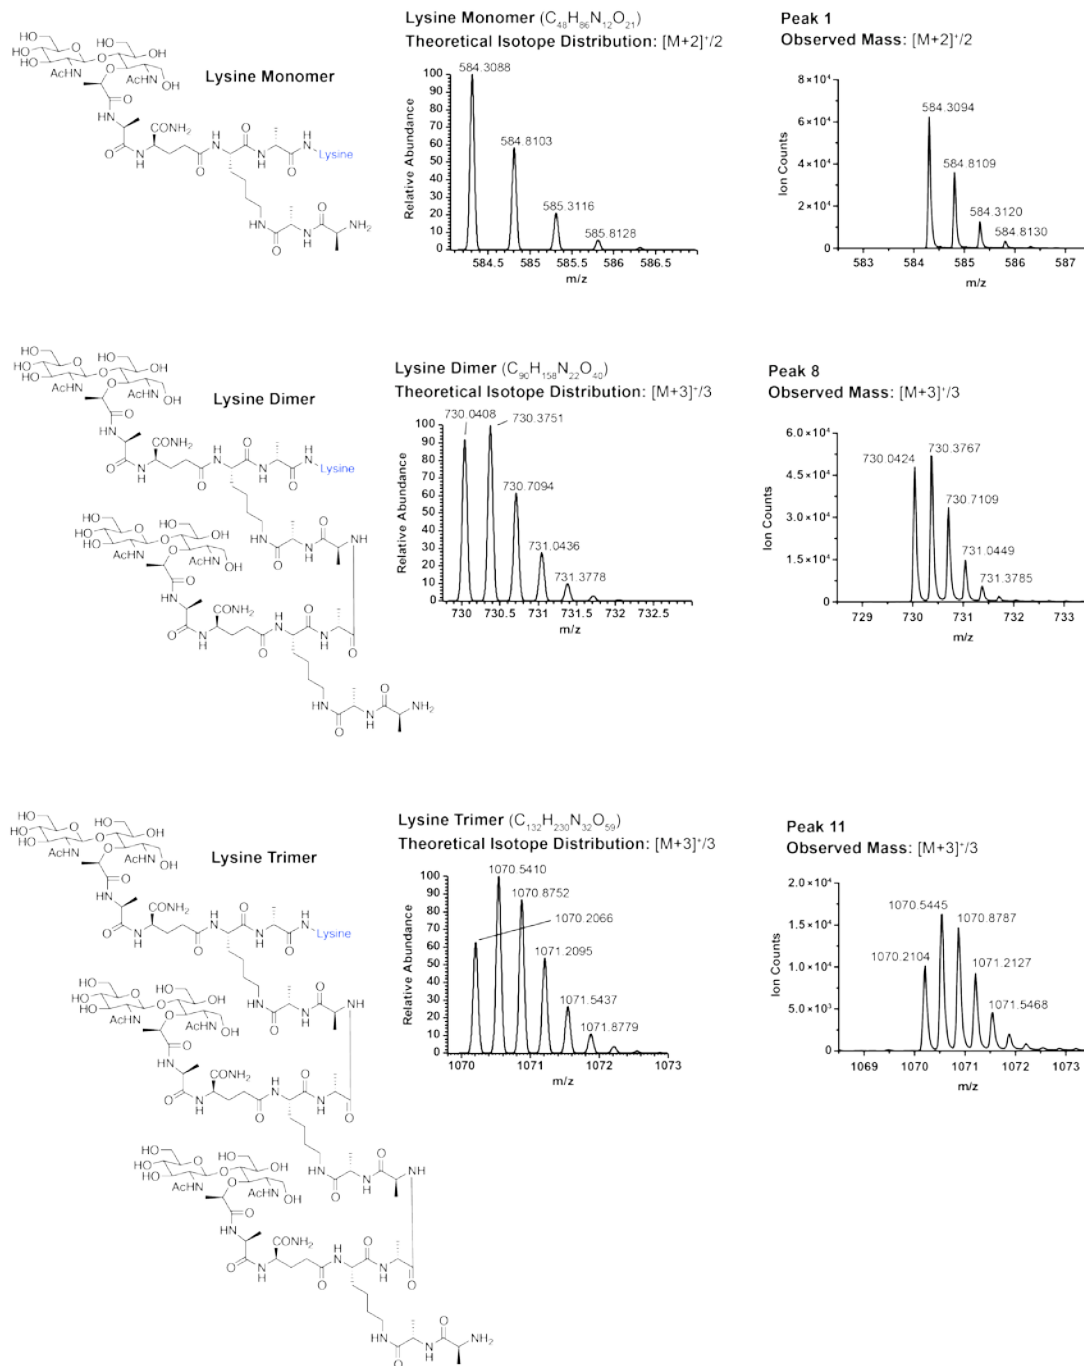

**Figure S23.** MS spectra of the mucopeptide-lysine adducts from *E. faecalis* peptidoglycan. See Figure S22 for total ion chromatograms.

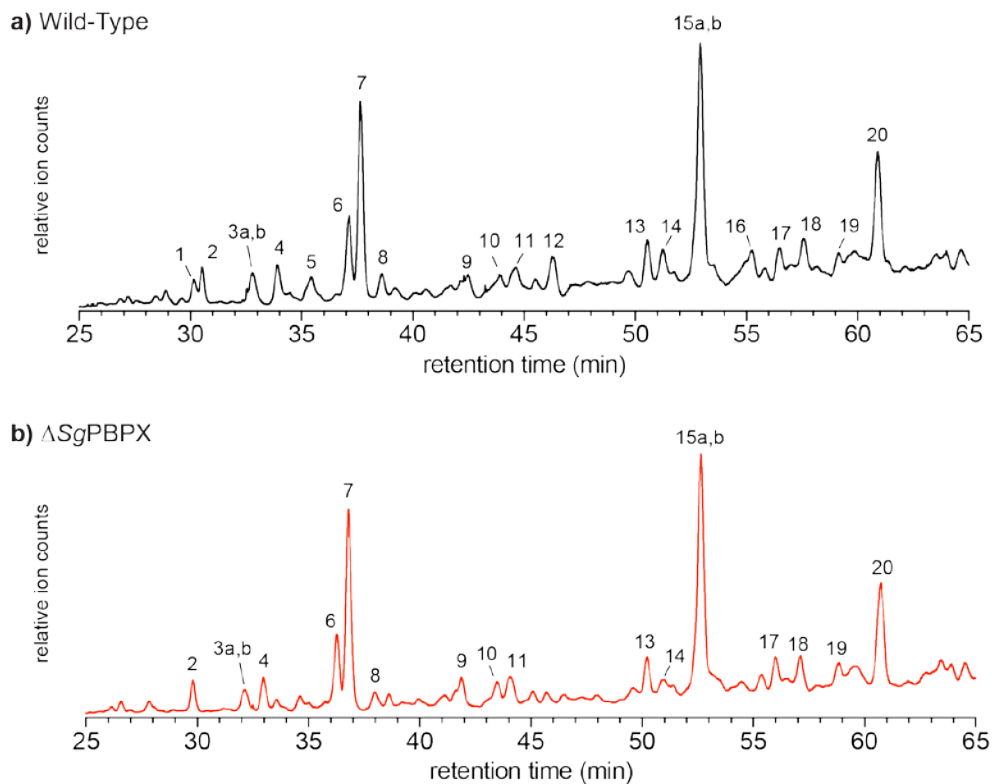

**Figure S24.** LC-MS analysis of *S. gordonii* peptidoglycan. Peptidoglycan was isolated from wild-type *S. gordonii* V288 (a) and  $\Delta$ SgPBPX cells (b) and digested with mutanolysin. Muropeptides were analyzed by LC-MS. See Table S7 for masses and proposed structures of each peak and Table S8 for relative peak areas within the sample.

**Table S7: Muropeptide masses detected in *S. gordonii* cell wall digests**

| Peak       | Observed Mass (charge)               | Order   | Proposed Stem Peptide                                   |
|------------|--------------------------------------|---------|---------------------------------------------------------|
| <b>1</b>   | 1167.61 (1), 584.31 (2)              | Monomer | L-Ala-D-isoGln-L-Lys-(L-Ala-L-Ala)-D-Ala-Lys            |
| <b>2</b>   | 927.45 (1), 464.23 (2)               | Monomer |                                                         |
| <b>3a</b>  | 698.31 (1)                           |         |                                                         |
| <b>3b</b>  | 720.29 (1)                           |         |                                                         |
| <b>4</b>   | 968.48 (1), 484.74 (2)               | Monomer | peak 7 lacking two alanines                             |
| <b>5</b>   | 1096.54 (1), 584.77 (2)              |         |                                                         |
| <b>6</b>   | 1039.52 (1), 520.26 (2)              | Monomer | L-Ala-D-isoGln-L-Lys-(L-Ala-L-Ala)-D-Ala                |
| <b>7</b>   | 1110.55 (1), 555.78 (2)              | Monomer | L-Ala-D-isoGln-L-Lys-(L-Ala-L-Ala)-D-Ala-D-Ala          |
| <b>8</b>   | 969.47 (1), 485.24 (2)               |         |                                                         |
| <b>9</b>   | 1111.54 (1), 556.27 (2)              | Monomer | L-Ala- <b>D-isoGlu</b> -L-Lys-(L-Ala-L-Ala)-D-Ala-D-Ala |
| <b>10</b>  | 1045.02 (2), 697.02 (3)              | Dimer   |                                                         |
| <b>11</b>  | 1066.03 (2), 711.02 (3)              |         |                                                         |
| <b>12</b>  | 1094.56 (2), 730.04 (3)              | Dimer   | crosslink of peaks 1 and 7                              |
| <b>13</b>  | 994.99 (2), 663.66 (3)               | Dimer   | crosslink of peaks 4 and 7                              |
| <b>14</b>  | 1059.02 (2), 706.35 (3)              |         |                                                         |
| <b>15a</b> | 1030.51 (2), 687.34 (3)              | Dimer   | crosslink of peaks 6 and 7                              |
| <b>15b</b> | 1066.03 (2), 711.02 (3)              | Dimer   | crosslinked dimer of peak 7                             |
| <b>16</b>  | 1070.21 (3), 802.91 (4)              | Trimer  | crosslink of peaks 7, 7, and 1                          |
| <b>17</b>  | 1066.52 (2), 711.35 (3)              | Dimer   | crosslink of peaks 7 and 9                              |
| <b>18</b>  | 1066.52 (2), 711.35 (3)              | Dimer   | isomer of peak 17                                       |
| <b>19</b>  | 1505.24 (2), 1003.84 (3), 753.13 (4) | Trimer  | crosslink of peaks 7, 7, and 4                          |
| <b>20</b>  | 1576.28 (2), 1051.19 (3), 788.64 (4) | Trimer  | crosslinked trimer of peak 5                            |

**Table S8: Relative abundance of muropeptide peaks in the *S. gordonii* cell wall<sup>a</sup>**

| Peak         | Monomers  |                 | Peak         | Dimers    |                 | Peak         | Trimers   |                 |
|--------------|-----------|-----------------|--------------|-----------|-----------------|--------------|-----------|-----------------|
|              | Wild-Type | $\Delta$ SGpbpX |              | Wild-Type | $\Delta$ SGpbpX |              | Wild-Type | $\Delta$ SGpbpX |
| <b>1</b>     | 4         | 0               | <b>12</b>    | 7         | 0               | <b>16</b>    | 3         | 0               |
| <b>4</b>     | 5         | 5               | <b>15a</b>   | 5         | 5               | <b>20</b>    | 5         | 6               |
| <b>6</b>     | 11        | 12              | <b>15b</b>   | 21        | 23              |              |           |                 |
| <b>7</b>     | 32        | 39              | <b>17</b>    | 2         | 3               |              |           |                 |
| <b>9</b>     | 3         | 5               | <b>18</b>    | 2         | 2               |              |           |                 |
| <b>Total</b> | 55        | 61              | <b>Total</b> | 37        | 33              | <b>Total</b> | 8         | 6               |

<sup>a</sup>Values were calculated by first extracting the peak mass from the total ion chromatogram, integrating the resulting EIC peak area, and dividing by the sum of all the muropeptide peak areas within each sample. Only peaks that could be unequivocally assigned as monomers/dimers/trimers (not derived from cleavage of crosslinks) were included in the analysis. We also found no reduction in crosslinking in the absence of SgPBPX when total peptidoglycan crosslinking was calculated using the method of Glauner.<sup>24</sup>

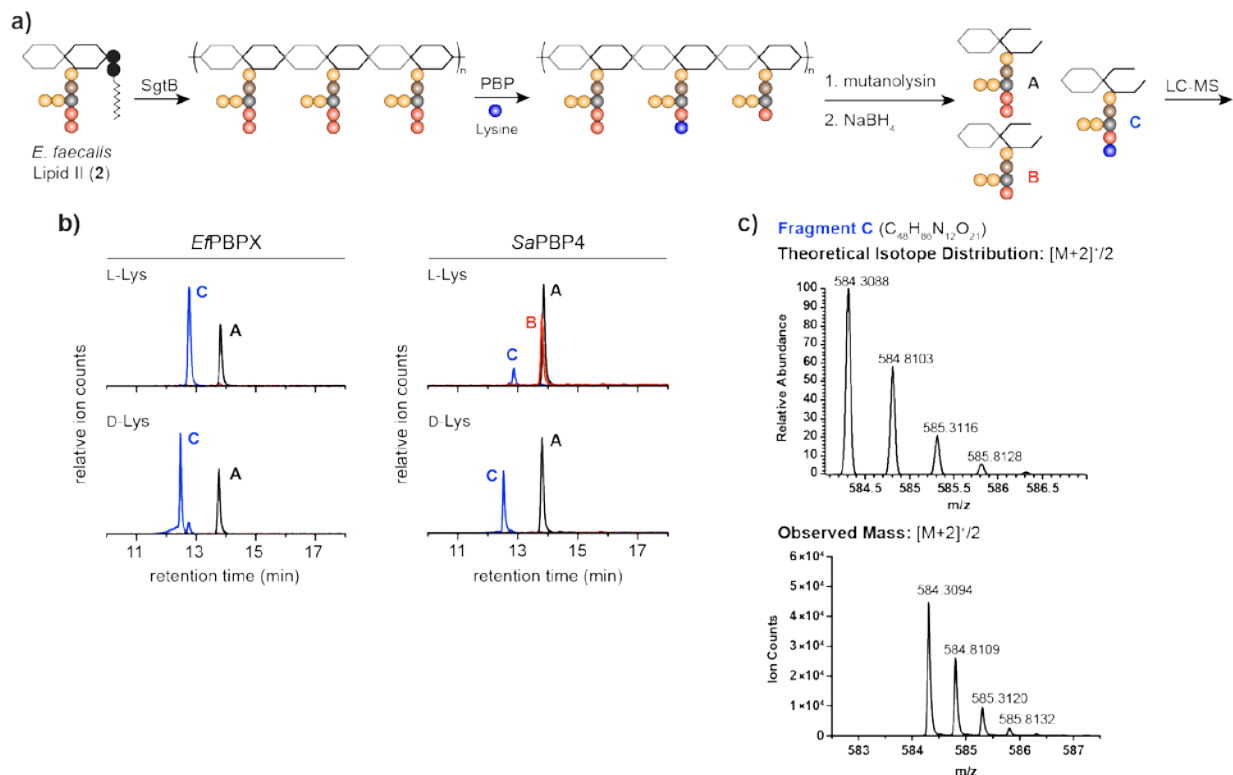

**Figure S25:** *E/PBPX* efficiently transfers both D- and L-lysine to *E. faecalis* peptidoglycan *in vitro*. a) Schematic of *E. faecalis* peptidoglycan labeling reactions. See Methods for reaction conditions. b) LC-MS extracted ion chromatograms of the products of D- and L-Lys labeling reactions using *E/PBPX* or *SaPBP4*. c) MS spectrum of the lysine-containing product C. See Figure S19 for MS spectra of products A and B.

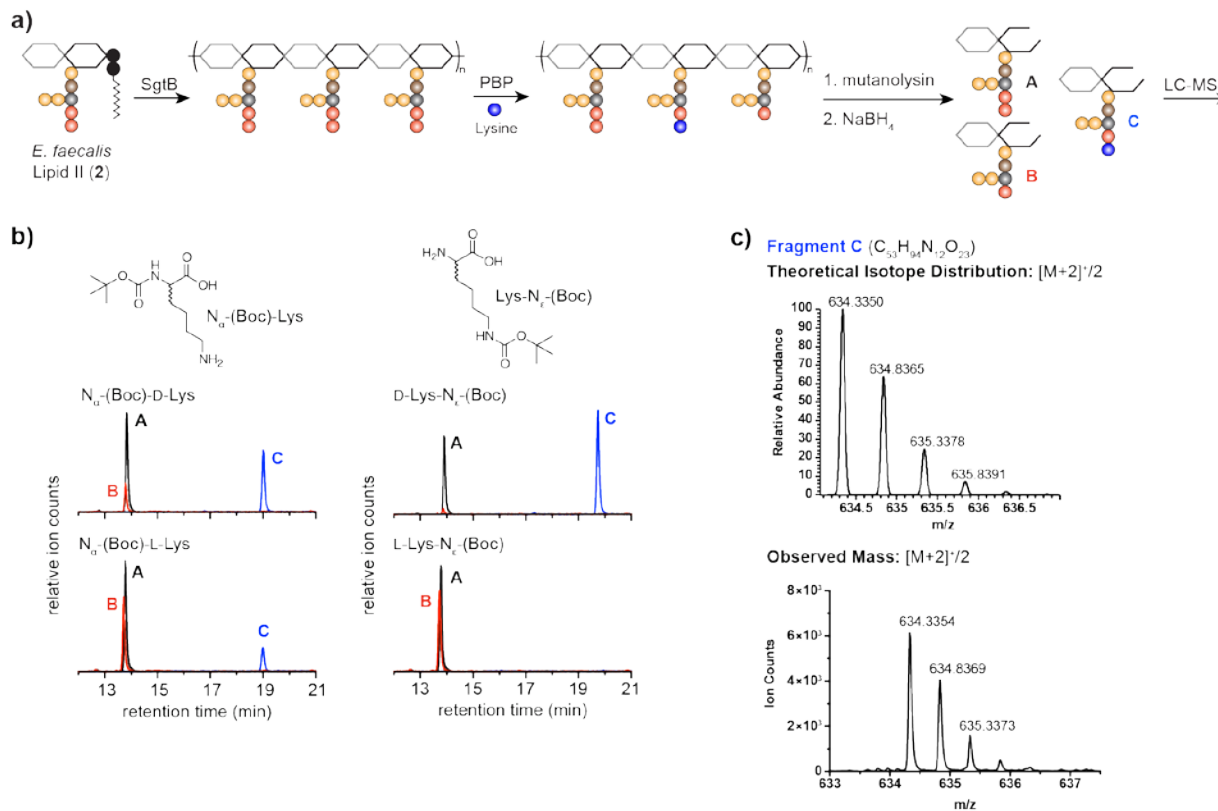

**Figure S26:** *Ef*PBPX can add Lys through the side chain amine. a) Schematic of *E. faecalis* peptidoglycan labeling reactions. See Methods for reaction conditions. b) LC-MS extracted ion chromatograms of the products of Boc-Lys labeling reactions using *Ef*PBPX. c) MS spectrum of the Boc-Lys-containing product C. See Figure S19 for MS spectra of products A and B.



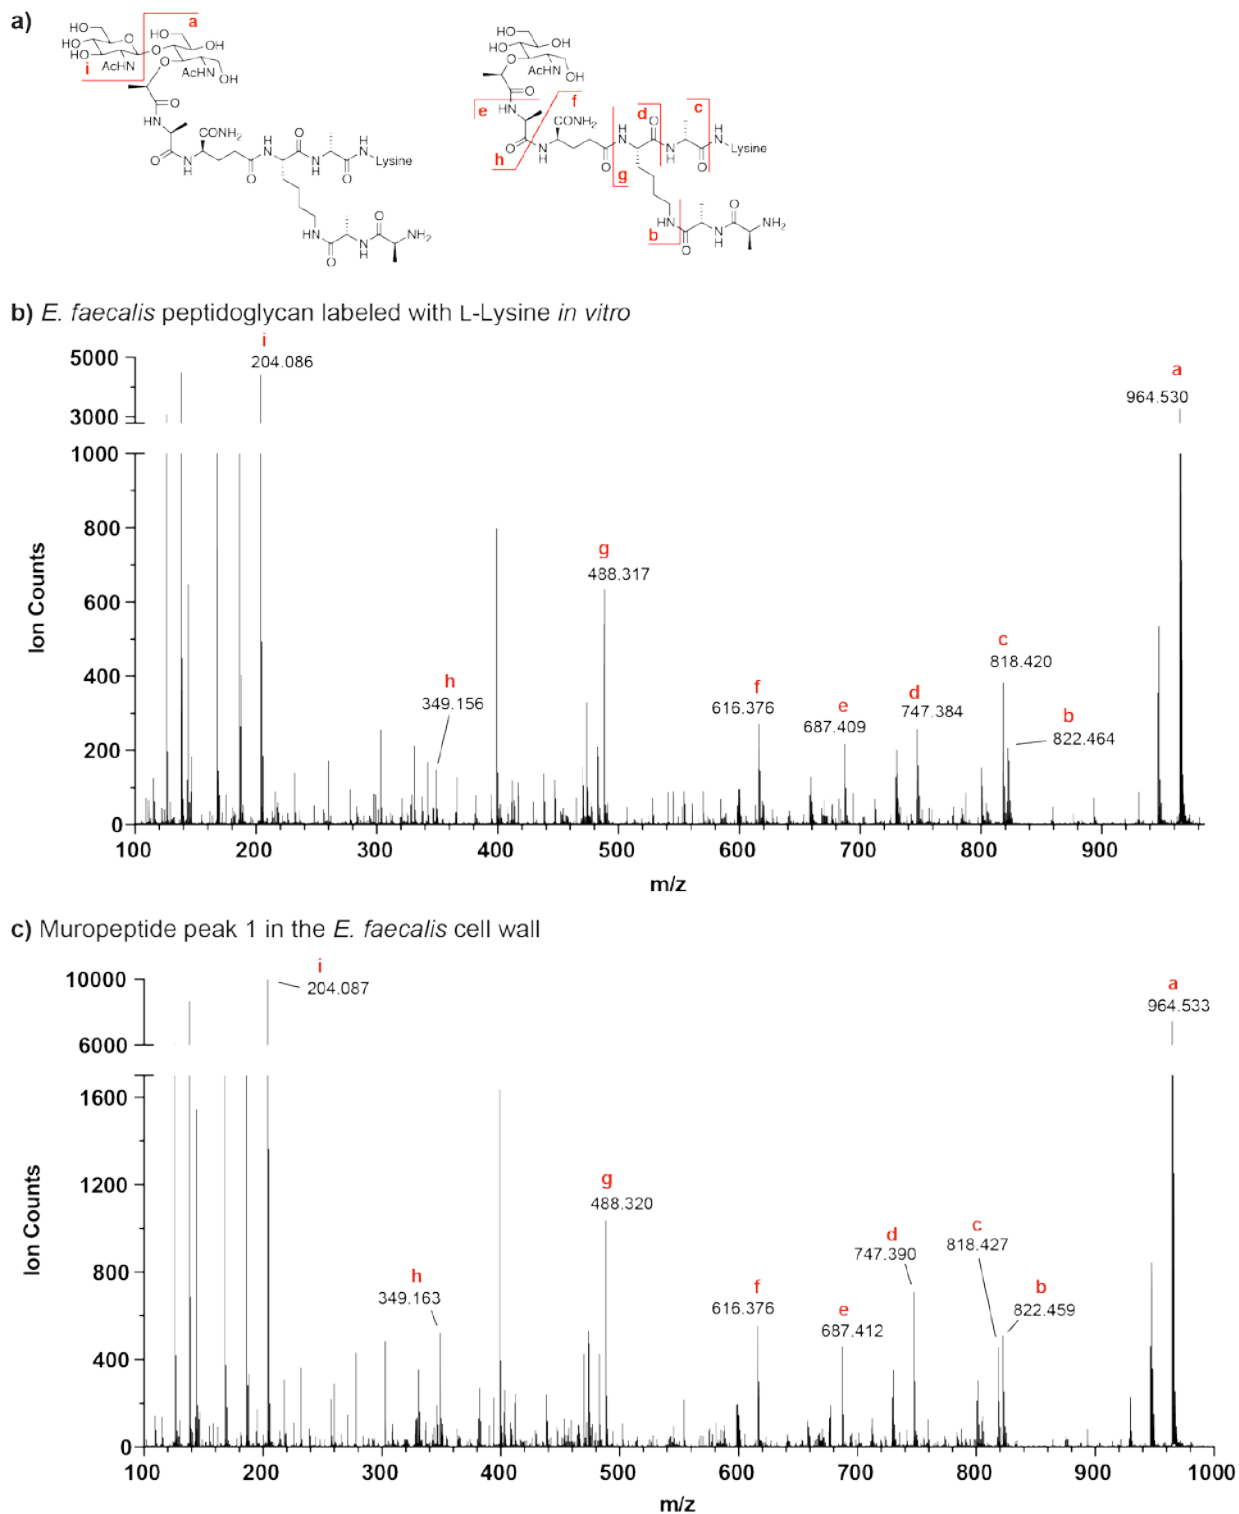

**Figure S27:** LC-MS/MS analysis of the cell wall-lysine adduct matches a sample prepared *in vitro*. a) Fragmentation pattern observed in MS/MS spectra. b) MS/MS spectrum of the product of *E. faecalis* peptidoglycan, generated from **2**, labeled with L-Lys using *Ef*PBPX. c) MS/MS spectrum of the lysine monomer adduct, peak 1 (see Figure S22), from wild-type *E. faecalis* peptidoglycan.

## References

- (1) (a) Qiao, Y.; Srisuknimit, V.; Rubino, F.; Schaefer, K.; Ruiz, N.; Walker, S.; Kahne, D. *Nat. Chem. Biol.* **2017**, *13*, 793-798; (b) Srisuknimit, V.; Qiao, Y.; Schaefer, K.; Kahne, D.; Walker, S. *J. Am. Chem. Soc.* **2017**.
- (2) (a) Lupoli, T. J.; Taniguchi, T.; Wang, T.-S.; Perlstein, D. L.; Walker, S.; Kahne, D. E. *J. Am. Chem. Soc.* **2009**, *131*, 18230-18231; (b) Tsukamoto, H.; Kahne, D. *Bioorg. Med. Chem. Lett.* **2011**, *21*, 5050-5053.
- (3) Wang, T.-S. A.; Manning, S. A.; Walker, S.; Kahne, D. *J. Am. Chem. Soc.* **2008**, *130*, 14068-14069.
- (4) Rebets, Y.; Lupoli, T.; Qiao, Y.; Schirner, K.; Villet, R.; Hooper, D.; Kahne, D.; Walker, S. *ACS Chem. Biol.* **2014**, *9*, 459-467.
- (5) Lupoli, T. J.; Tsukamoto, H.; Doud, E. H.; Wang, T.-S. A.; Walker, S.; Kahne, D. *J. Am. Chem. Soc.* **2011**, *133*, 10748-10751.
- (6) Qiao, Y.; Lebar, M. D.; Schirner, K.; Schaefer, K.; Tsukamoto, H.; Kahne, D.; Walker, S. *J. Am. Chem. Soc.* **2014**, *136*, 14678-14681.
- (7) Gerlt, J. A. *Biochemistry* **2017**, *56*, 4293-4308.
- (8) Fenton, A. K.; Mortaji, L. E.; Lau, D. T. C.; Rudner, D. Z.; Bernhardt, T. G. *Nat. Microbiol.* **2016**, *2*, 16237.
- (9) Yoshida, Y.; Yang, J.; Peaker, P.-E.; Kato, H.; Bush, C. A.; Cisar, J. O. *J. Biol. Chem.* **2008**, *283*, 12654-12664.
- (10) Lebar, M. D.; May, J. M.; Meeske, A. J.; Leiman, S. A.; Lupoli, T. J.; Tsukamoto, H.; Losick, R.; Rudner, D. Z.; Walker, S.; Kahne, D. *J. Am. Chem. Soc.* **2014**, *136*, 10874-10877.
- (11) (a) Barrett, D.; Wang, T.-S. A.; Yuan, Y.; Zhang, Y.; Kahne, D.; Walker, S. *J. Biol. Chem.* **2007**, *282*, 31964-31971; (b) Wang, T.-S. A.; Lupoli, T. J.; Sumida, Y.; Tsukamoto, H.; Wu, Y.; Rebets, Y.; Kahne, D. E.; Walker, S. *J. Am. Chem. Soc.* **2011**, *133*, 8528-8530.
- (12) Huycke, M. M.; Spiegel, C. A.; Gilmore, M. S. *Antimicrob. Agents Chemother.* **1991**, *35*, 1626-1634.
- (13) Zhang, X.; Paganelli, F. L.; Bierschenk, D.; Kuipers, A.; Bonten, M. J. M.; Willems, R. J. L.; van Schaik, W. *PLoS Genet.* **2012**, *8*, e1002804.
- (14) Cruz-Rodz, A. L.; Gilmore, M. S. *Mol. Gen. Genet.* **1990**, *224*, 152-154.
- (15) Kühner, D.; Stahl, M.; Demircioglu, D. D.; Bertsche, U. *Sci. Rep.* **2014**, *4*, 7494-7497.
- (16) Sahn, D. F.; Kissinger, J.; Gilmore, M. S.; Murray, P. R.; Mulder, R.; Solliday, J.; Clarke, B. *Antimicrob. Agents Chemother.* **1989**, *33*, 1588-1591.
- (17) Macrina, F. L.; Tobian, J. A.; Jones, K. R.; Evans, R. P.; Clewell, D. B. *Gene* **1982**, *19*, 345-353.
- (18) Hoskins, J.; Alborn, W. E.; Arnold, J.; Blaszcak, L. C.; Burgett, S.; DeHoff, B. S.; Estrem, S. T.; Fritz, L.; Fu, D. J.; Fuller, W.; Geringer, C.; Gilmour, R.; Glass, J. S.; Khoja, H.; Kraft, A. R.; Lagace, R. E.; LeBlanc, D. J.; Lee, L. N.; Lefkowitz, E. J.; Lu, J.; Matsushima, P.; McAhren, S. M.; McHenney, M.; McLeaster, K.; Mundy, C. W.; Nicas, T. I.; Norris, F. H.; O'Gara, M.; Peery, R. B.; Robertson, G. T.; Rockey, P.; Sun, P. M.; Winkler, M. E.; Yang, Y.; Young-Bellido, M.; Zhao, G.; Zook, C. A.; Baltz, R. H.; Jaskunas, S. R.; Rosteck, P. R.; Skatrud, P. L.; Glass, J. I. *J. Bacteriol.* **2001**, *183*, 5709-5717.
- (19) Studier, F. W.; Moffatt, B. A. *J. Mol. Biol.* **1986**, *189*, 113-130.

- (20) Heaslet, H.; Shaw, B.; Mistry, A.; Miller, A. A. *J. Struct. Biol.* **2009**, *167*, 129-135.
- (21) Trieu-Cuot, P.; Carlier, C.; Poyart-Salmeron, C.; Courvalin, P. *Nucleic Acids Res.* **1990**, *18*, 4296.
- (22) Finn, R. D.; Coggill, P.; Eberhardt, R. Y.; Eddy, S. R.; Mistry, J.; Mitchell, A. L.; Potter, S. C.; Punta, M.; Qureshi, M.; Sangrador-Vegas, A.; Salazar, G. A.; Tate, J.; Bateman, A. *Nucleic Acids Res.* **2016**, *44*, D279-85.
- (23) Kumarasiri, M.; Fisher, J. F.; Mobashery, S., Penicillin-binding Protein 5 of *Escherichia coli*. In *Handbook of Proteolytic Enzymes*, Elsevier Ltd: 2012; pp 3474-3480.
- (24) Glauner, B. *Anal. Biochem.* **1988**, *172*, 451-464.
